# Supplementary material for: Bioinspired passive radiative cooler with superior transparency and durability for energy-efficient building
Source: Research Square preprint supplement (doi:10.21203/rs.3.rs-6024085/v1), 2025-08-18
Supplement: Supplementary file 1 [file 6cbc971a595443ebf74df4a1.docx]

Supplementary Materials for

**Bioinspired passive radiative cooler with superior transparency and durability for energy-efficient building**

*Hanliang Ding1, Bo Li1,2,*, Yicong Zhang1, Yufan Zhang1, Shichao Niu1,2,3,*, Zhiwu Han1,2,3,*, Luquan Ren1,2,3*

1 Key Laboratory of Bionic Engineering (Ministry of Education), Jilin University, Changchun 130022, People’s Republic of China

2 The National Key Laboratory of Automotive Chassis Integration and Bionics (ACIB), College of Biological and Agricultural Engineering, Jilin University, Changchun 130022, China

3 Institute of Structured and Architected Materials, Liaoning Academy of Materials, Shenyang 110167, China

*Correspondence to: boli@jlu.edu.cn; niushichao@jlu.edu.cn; zwhan@jlu.edu.cn

**This PDF file includes:**

Supplementary Figs. 1 to 24

Supplementary Table 1

**Other Supplementary Materials for this manuscript include the following:**

Supplementary Movies 1 and 2

**
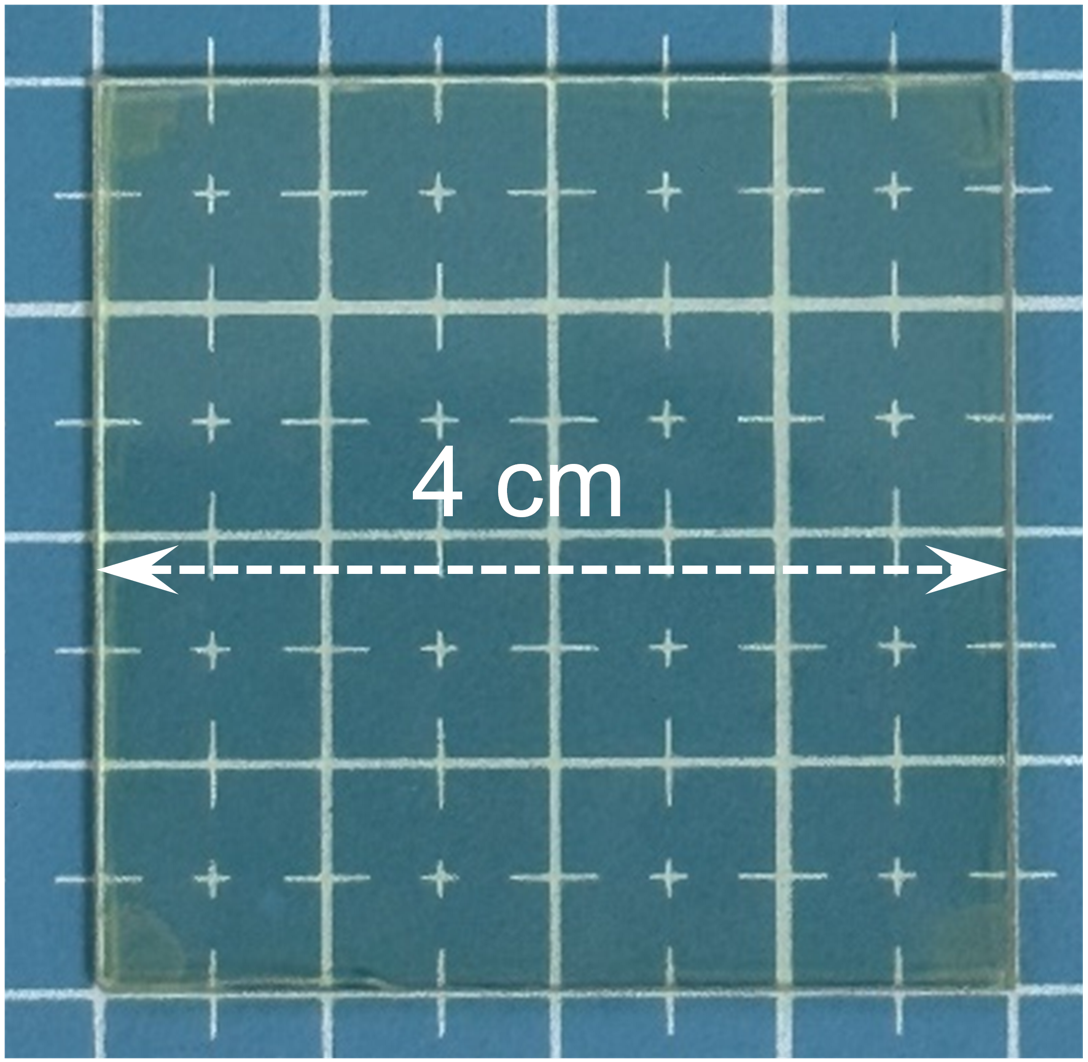
**

**Supplementary Fig. 1. Bio-PRC device fabricated under laboratory condition.**

**
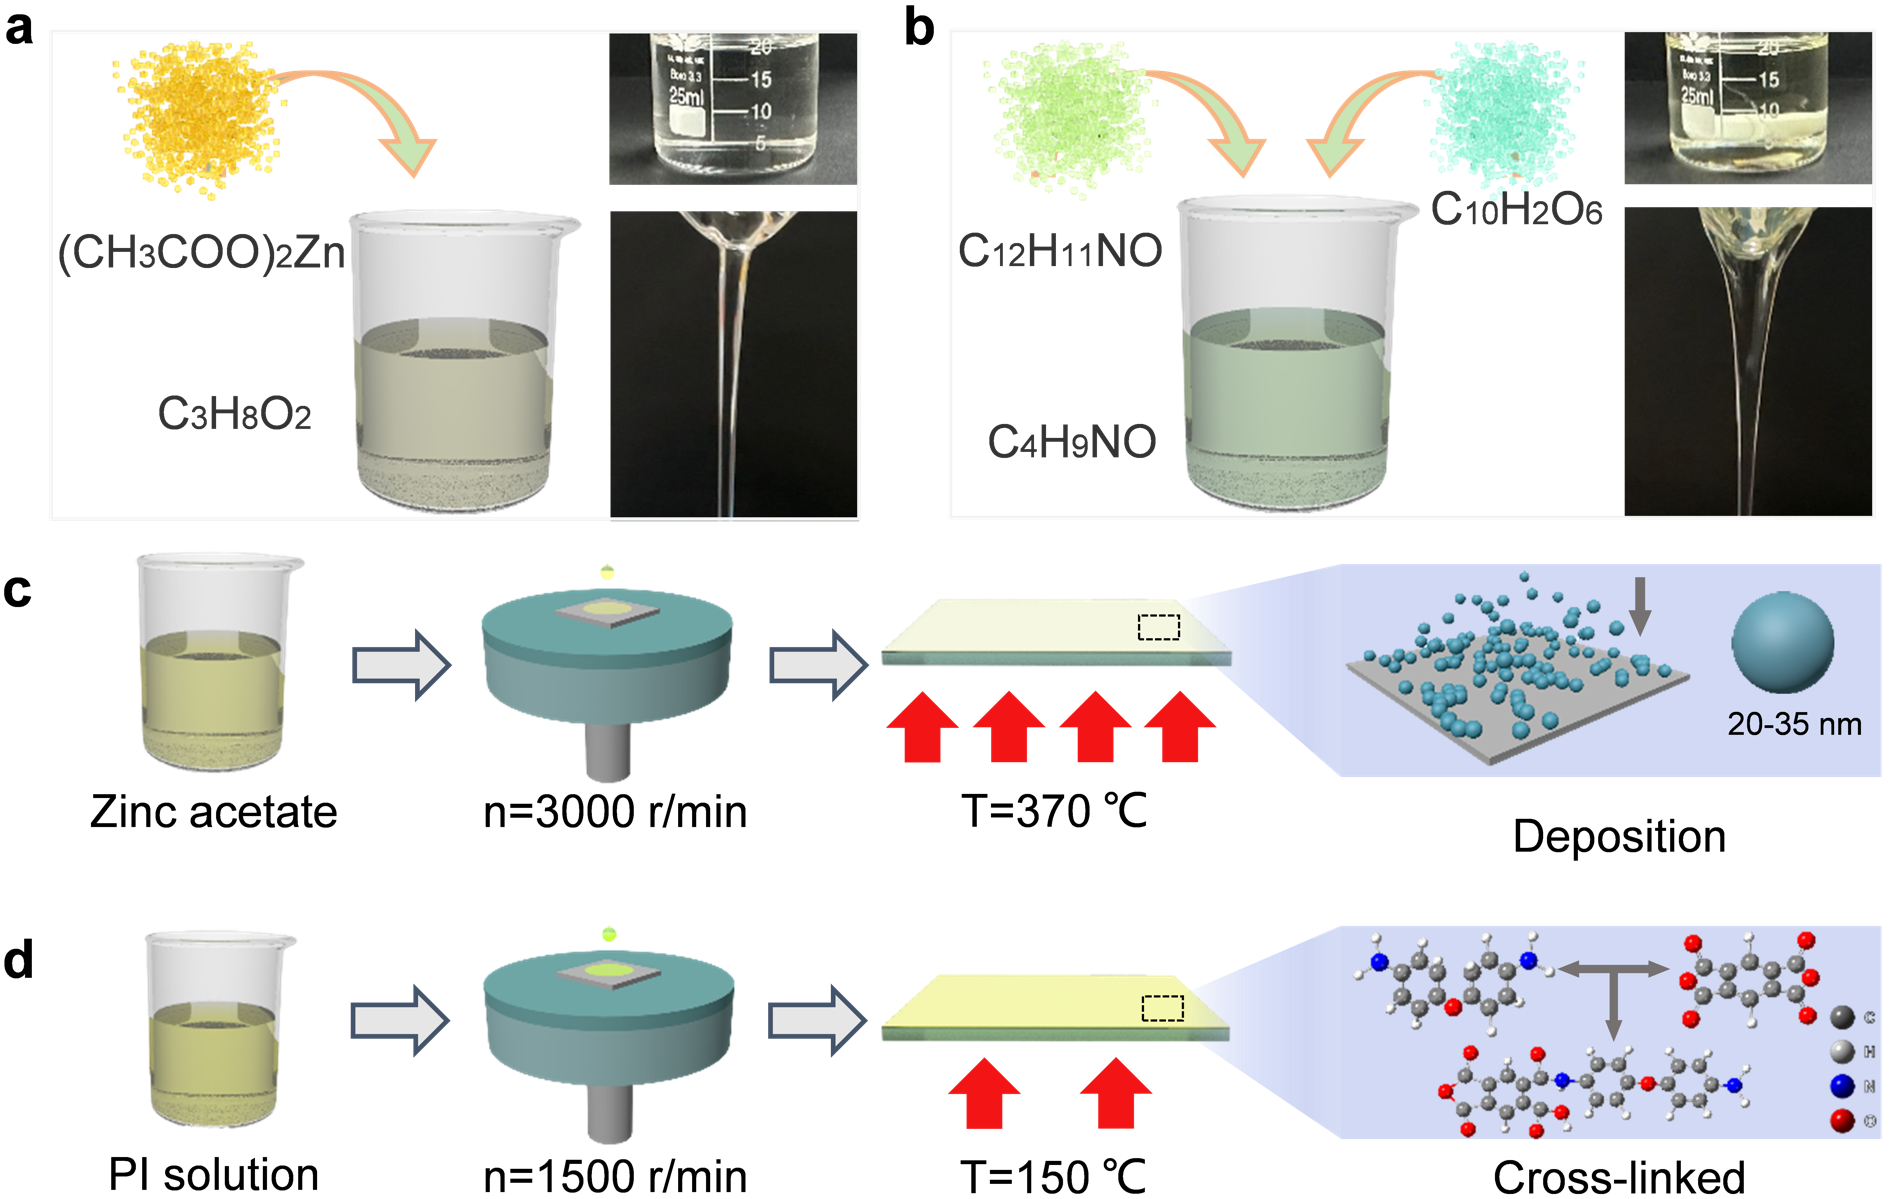
**

**Supplementary Fig. 2. Fabrication process and parameters of PRC device.** **a,** Preparation of zinc acetate solution and its flowability after stabilization. **b,** Preparation of PI precursor solution and its flowability after stabilization. **c,** Process and conditions for preparing ZnO layer. **d,** Process and conditions for preparing PI layer.

**
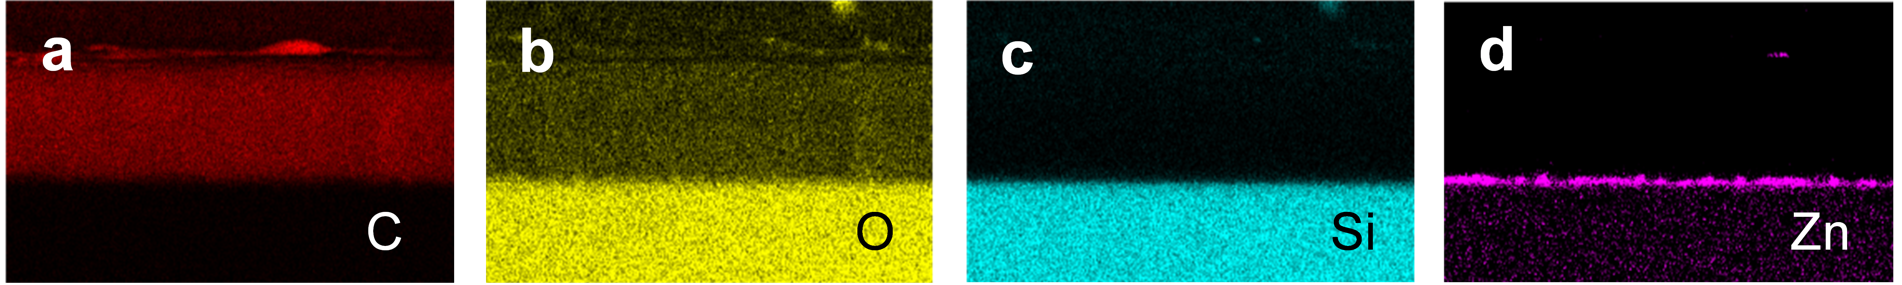
**

**Supplementary Fig. 3. Distribution of various elements on PRC device.**

**
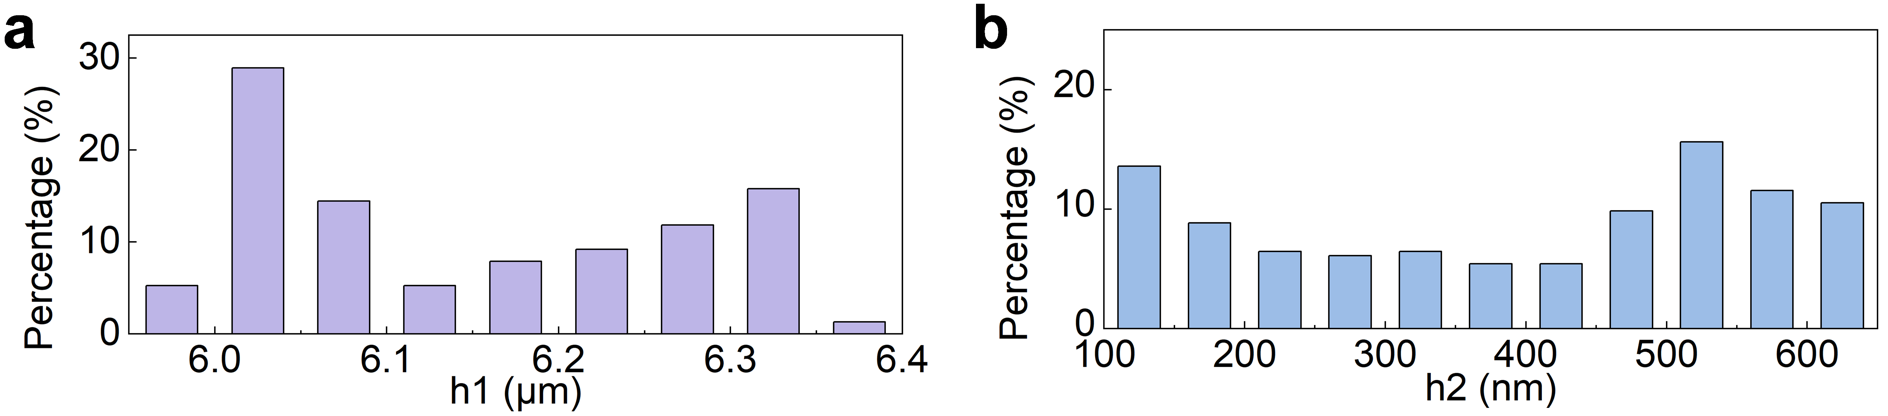
**

**Supplementary Fig. 4. Statistical analysis of the structural dimensions of each layer of PRC device. a,** Thickness statistics of PI layer. **b,** Thickness statistics of ZnO layer.

**
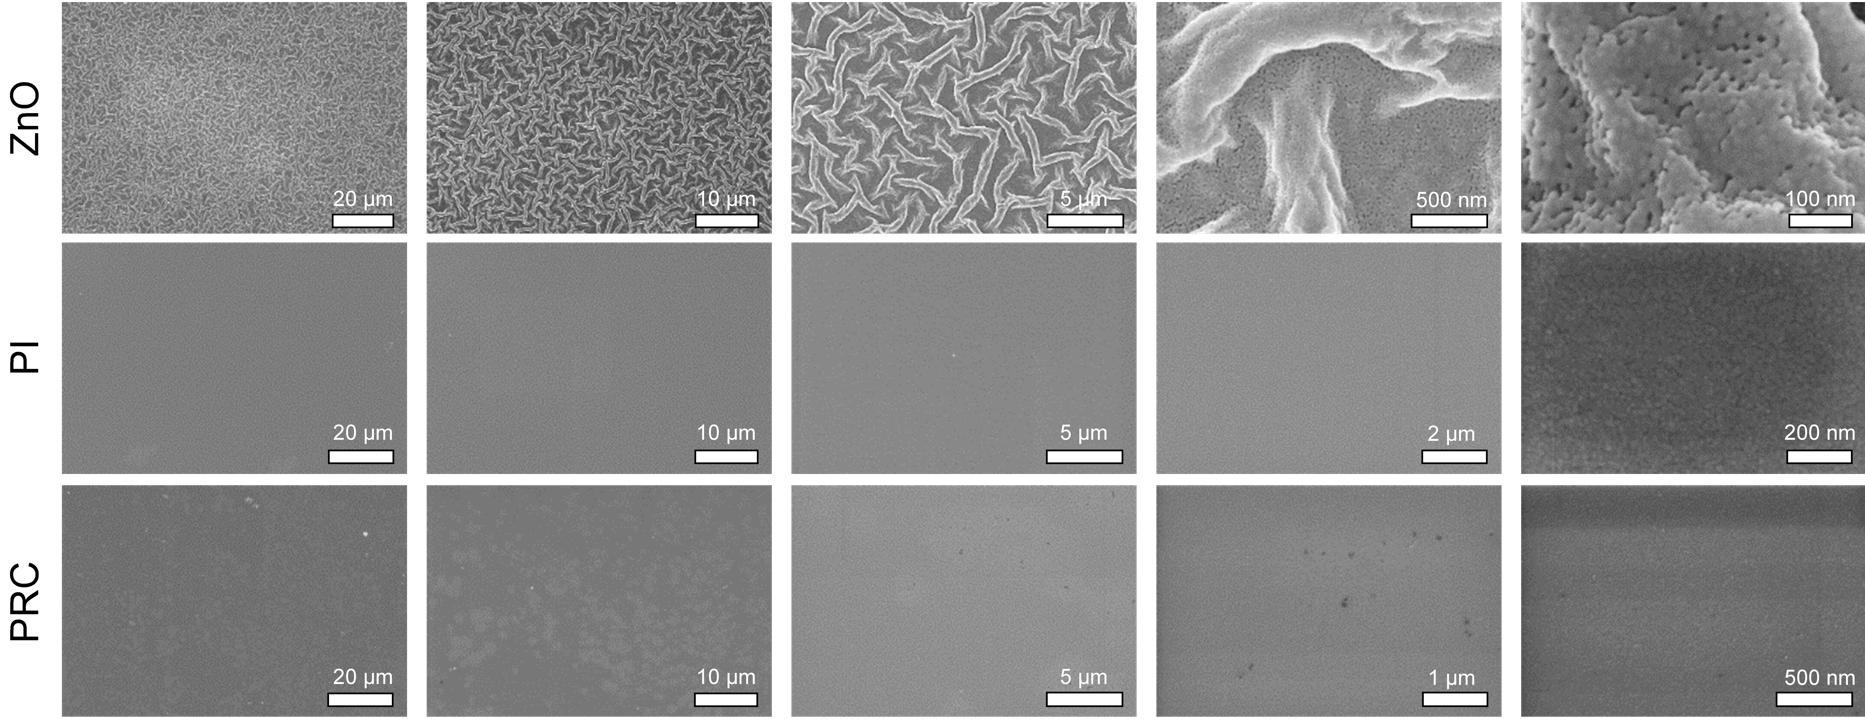
**

**Supplementary Fig. 5.** **SEM characterization of various surface structures. The ZnO represents that decomposition of Zinc acetate to form a wrinkled surface by the accumulation of ZnO nano-spheres. The PI represents that pi layer is directly fabricated on bare glass, while the PRC including pi layer and ZnO layer.**

**
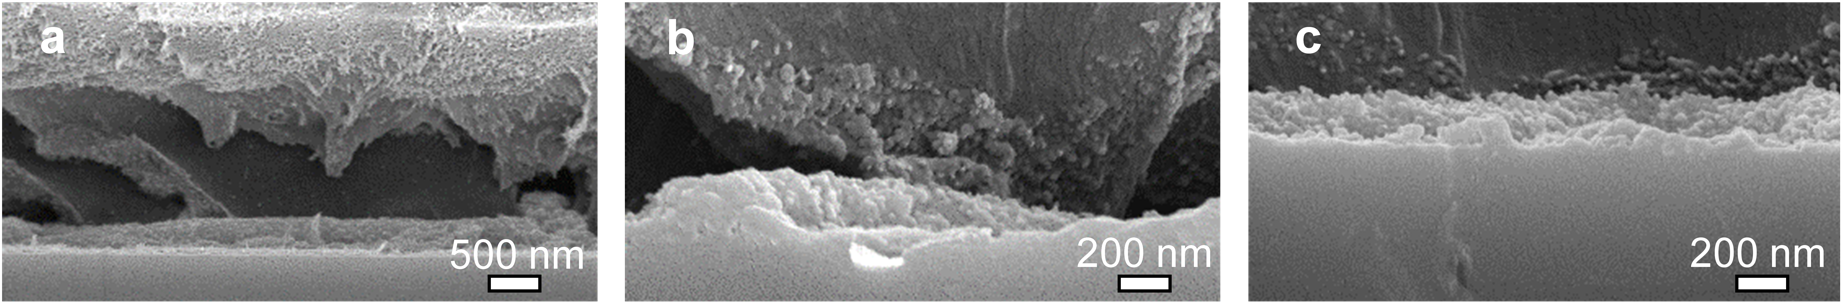
**

**Supplementary Fig. 6.** **SEM characterization of the structural joint surface between the PI layer and ZnO layer.** **a,** PI surface is uniformly distributed with nano-ZnO particles, indicating that pi solution has good wettability in nano-ZnO layer during the fabrication process. **b,** After the separation of the PI layer and the nano-ZnO layer, a large number of nano-ZnO particles will adhere locally, and this bonding mechanism is the reason for the enhanced adhesion. **c,** The remained nano-ZnO layer.

**
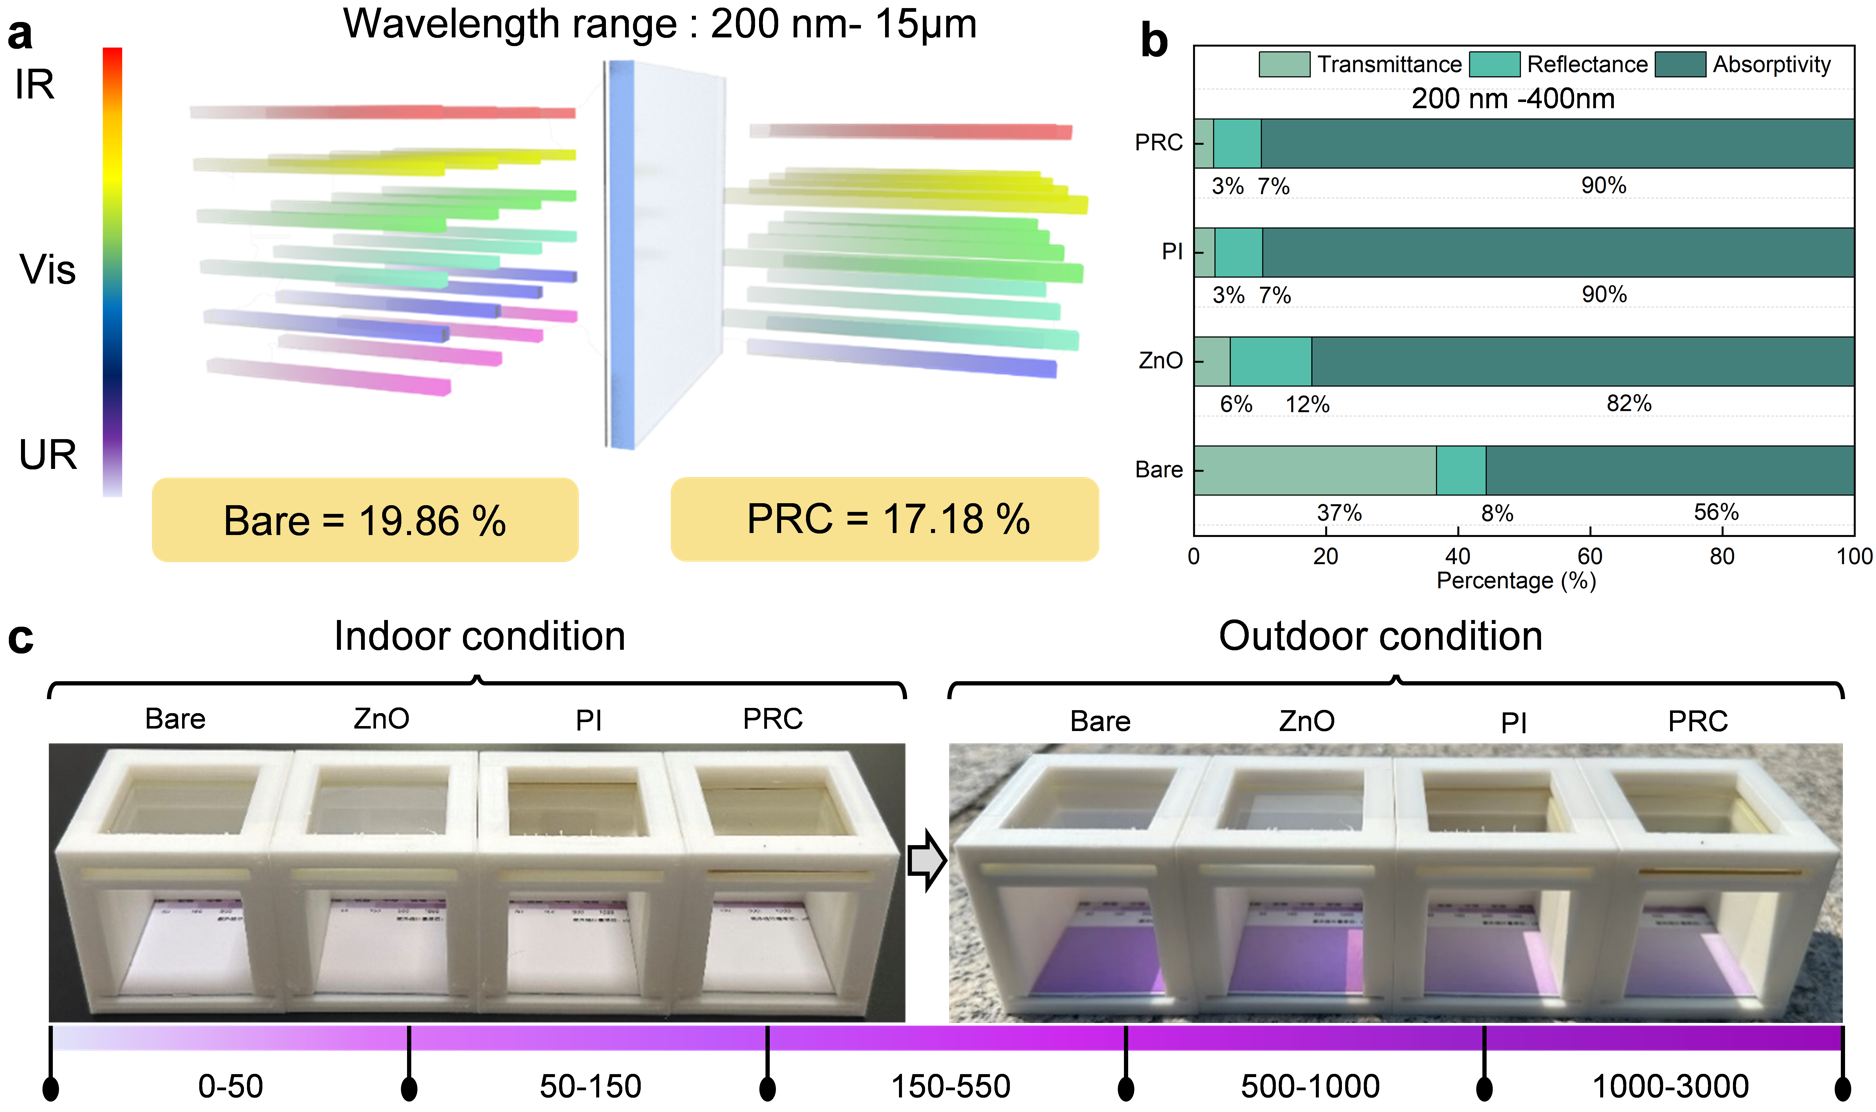
**

**Supplementary Fig. 7.** **The UV resistance of PRC device.** **a,** Within the entire testing wavelength, the transmittance of bare glass is 19.86%, while the transmittance of PRC film is 17.18%. **b,** The transmittance, reflectance, and absorbance of four samples in the ultraviolet region. **c,** UV resistance of four samples under indoor and outdoor conditions. After passing through PRC and PI device, the ultraviolet component of sunlight is significantly reduced.

**
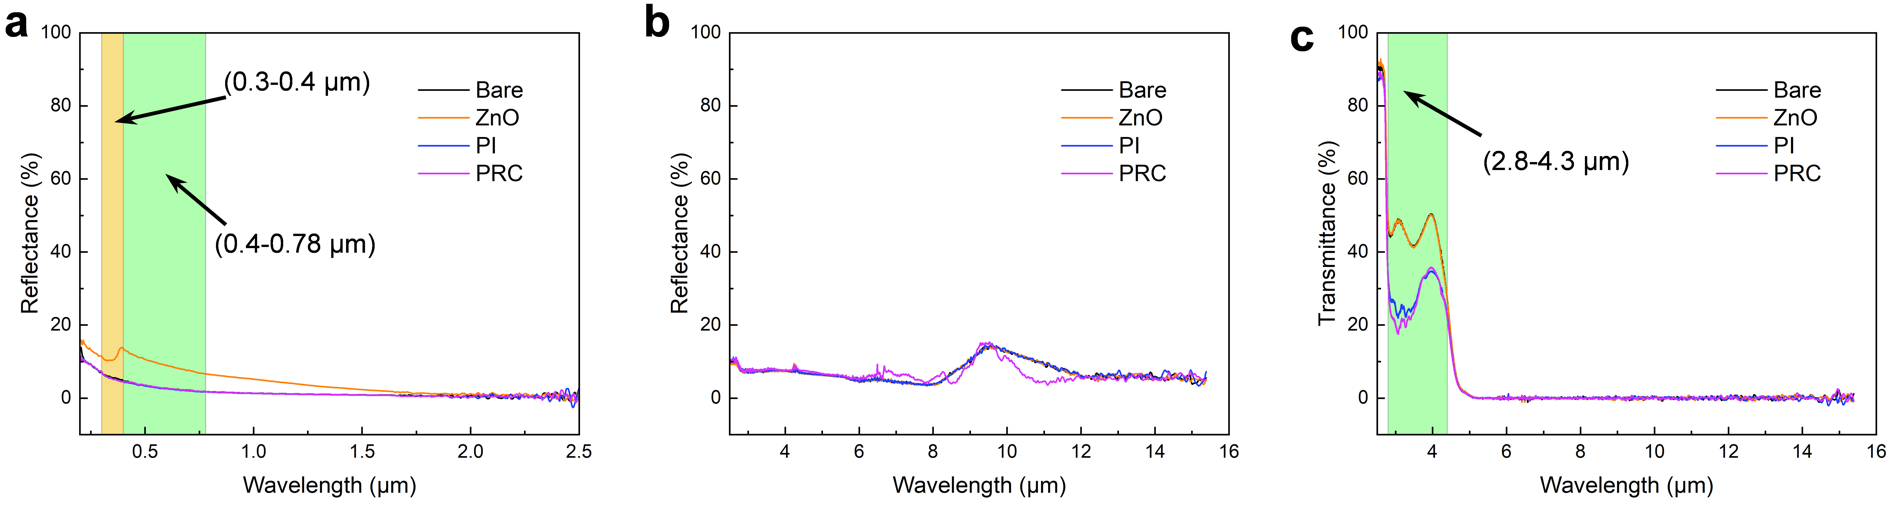
**

**Supplementary Fig. 8.** **The optical property of PRC devcie.** **a,** Reflectance of four samples in UV (0.2-0.4 μm), VIS (0.4-0.78 μm) and NIR (0.78-2.5 μm). **b,** Reflectance of four samples in MIR (2.5-15 μm). **c,** Transmittance of four samples in MIR (2.5-15 μm).

**
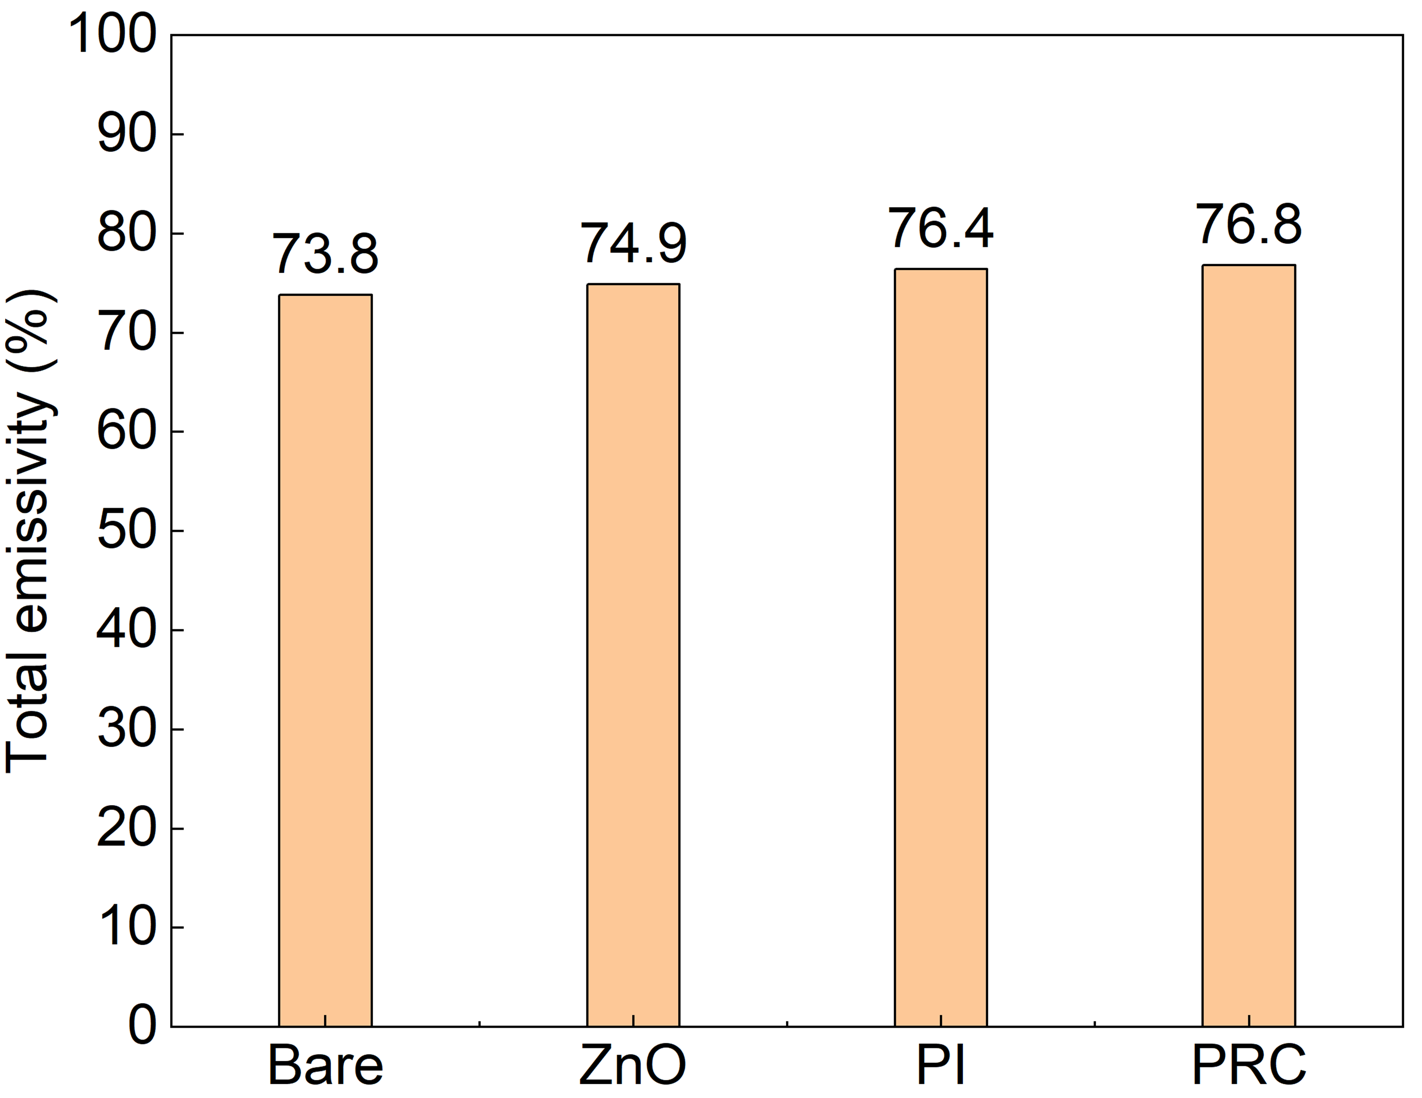
**

**Supplementary Fig. 9. Statistical of emissivity of four samples in the entire testing range.**

**
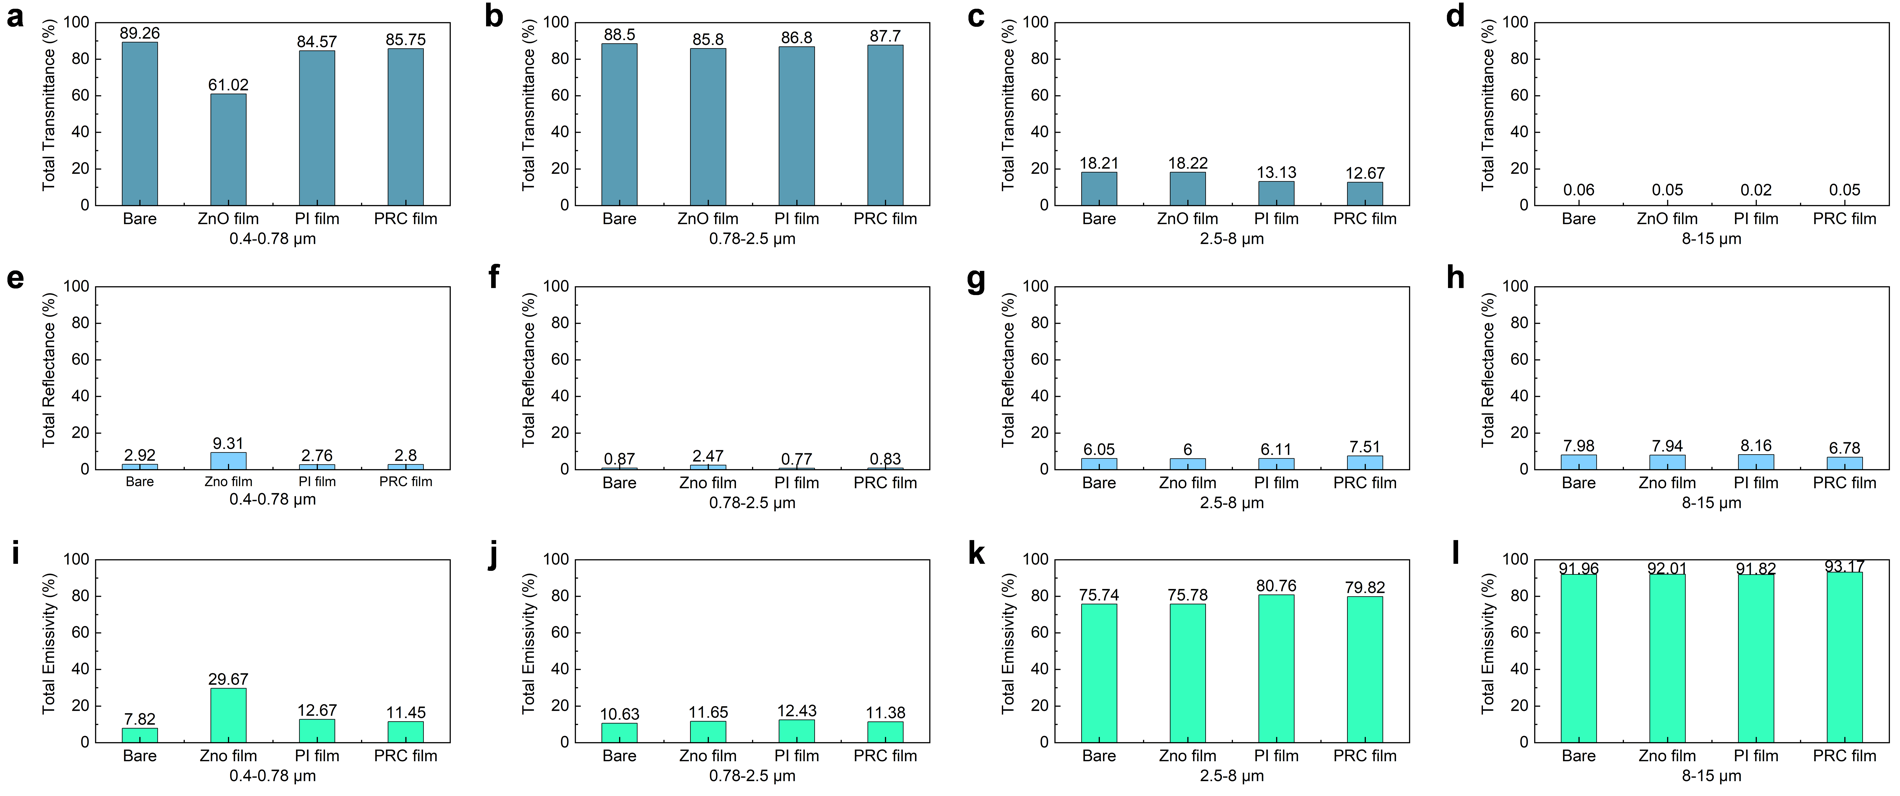
**

**Supplementary Fig. 10.** **Statistical analysis of optical properties of four samples in different testing range.** **a-d,** Transmittance statistical analysis of four samples in different testing range. **e-h,** Reflectance statistical analysis of four samples in different testing range. **i-l,** Emissivity statistical analysis of four samples in different testing range.

**
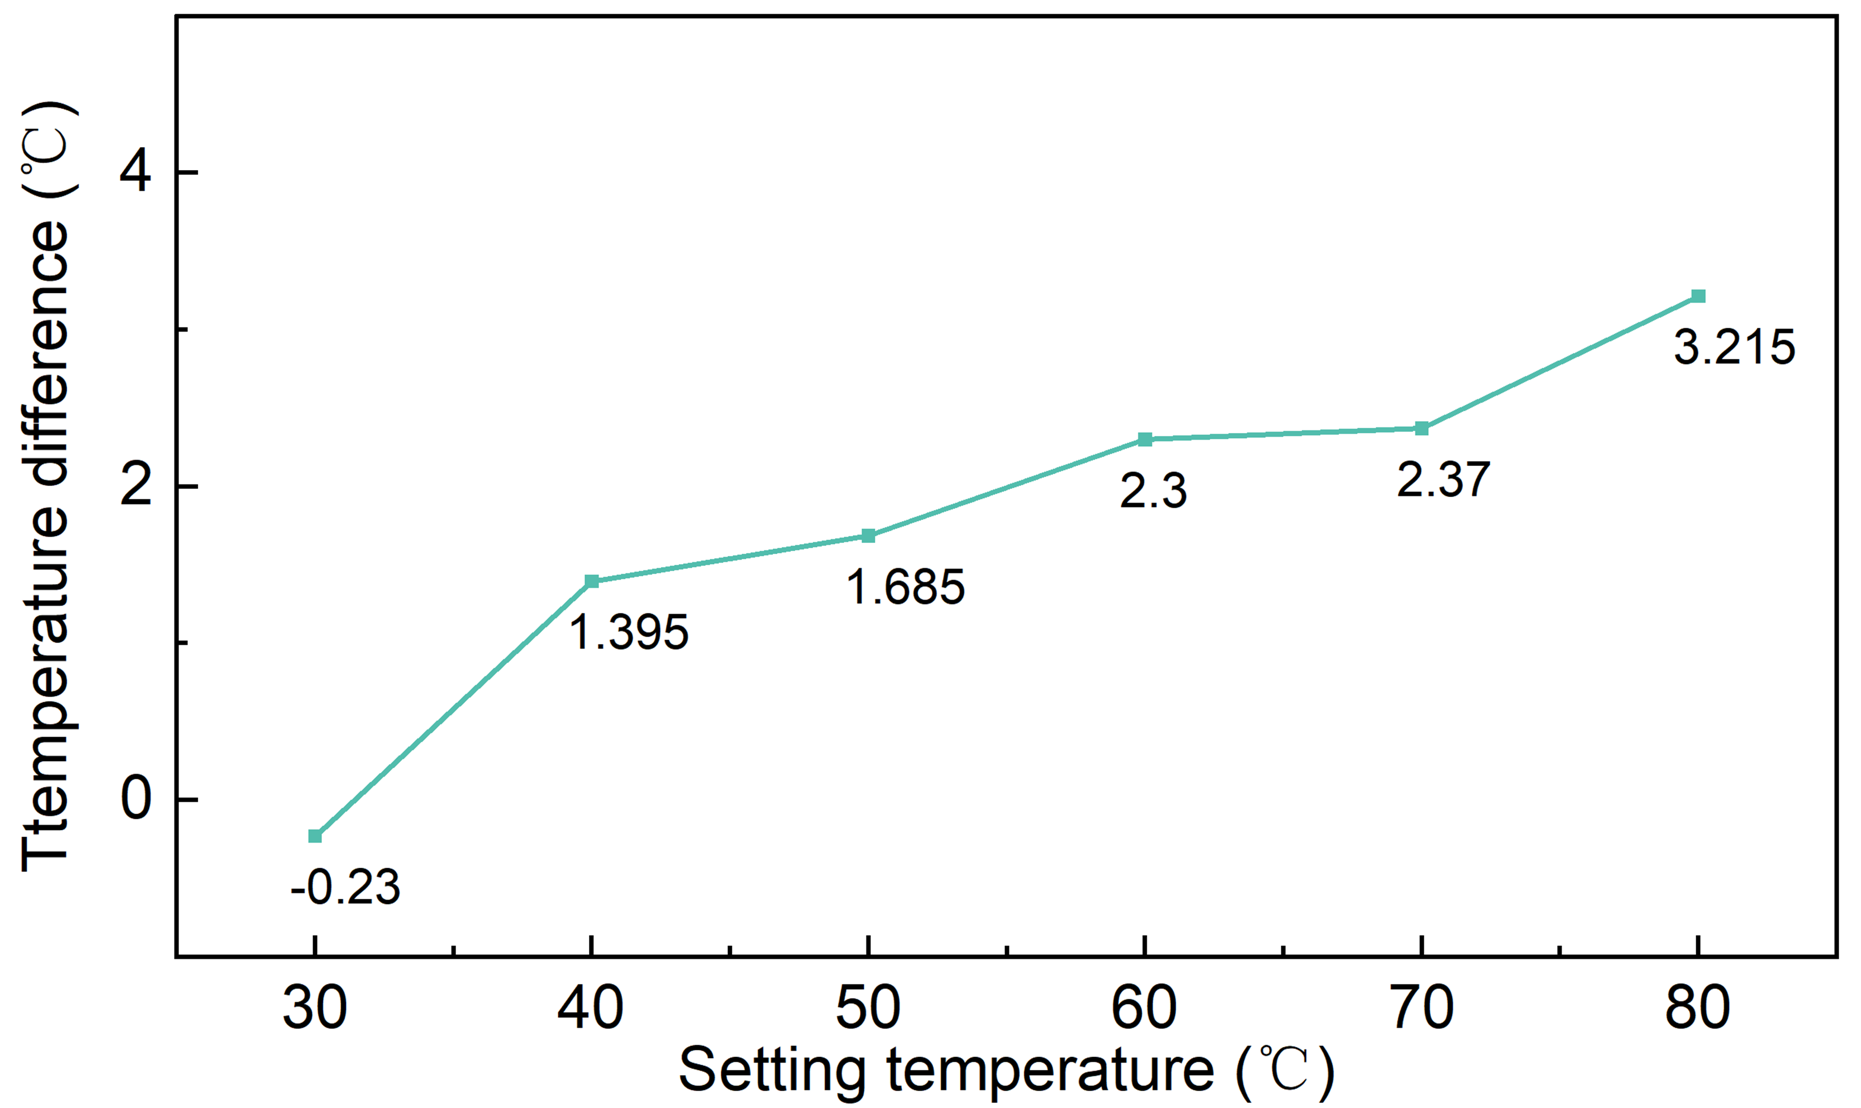
**

**Supplementary Fig. 11. Temperature difference between heating table surface and bare glass surface.**

**
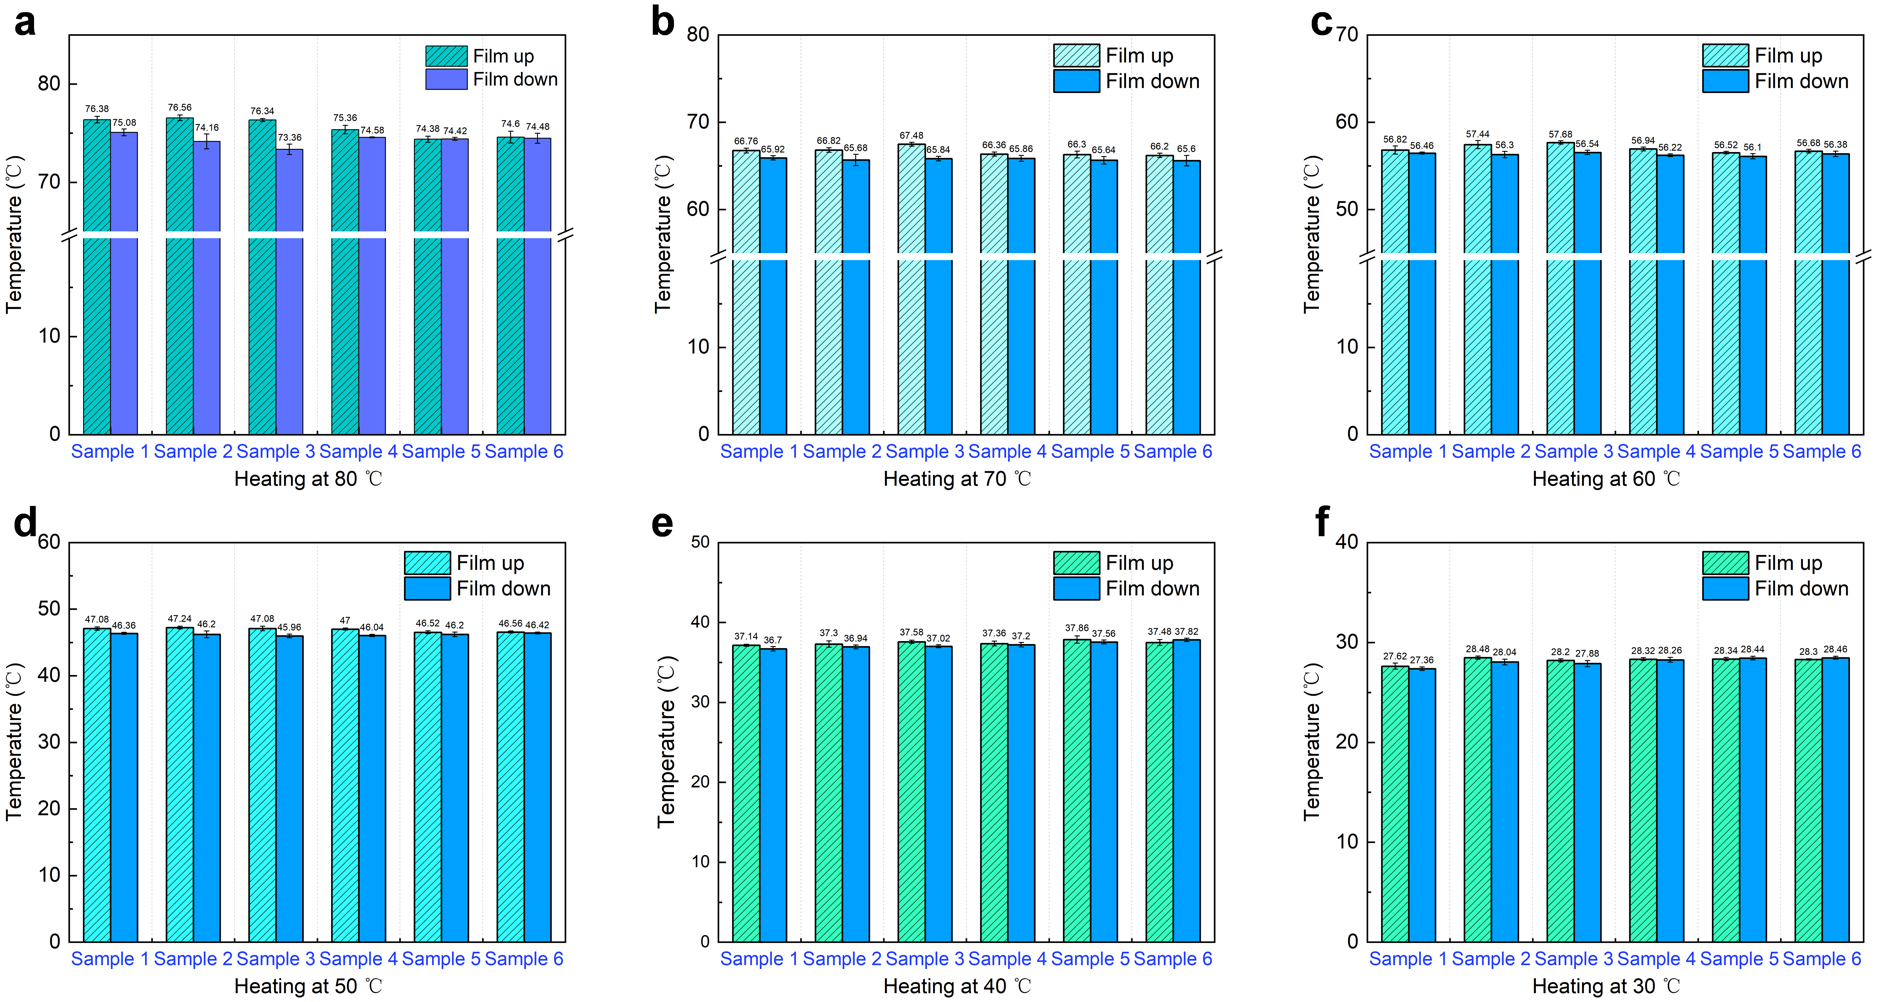
**

**Supplementary Fig. 12. Surface temperature of different PRC devices at different states.**

**
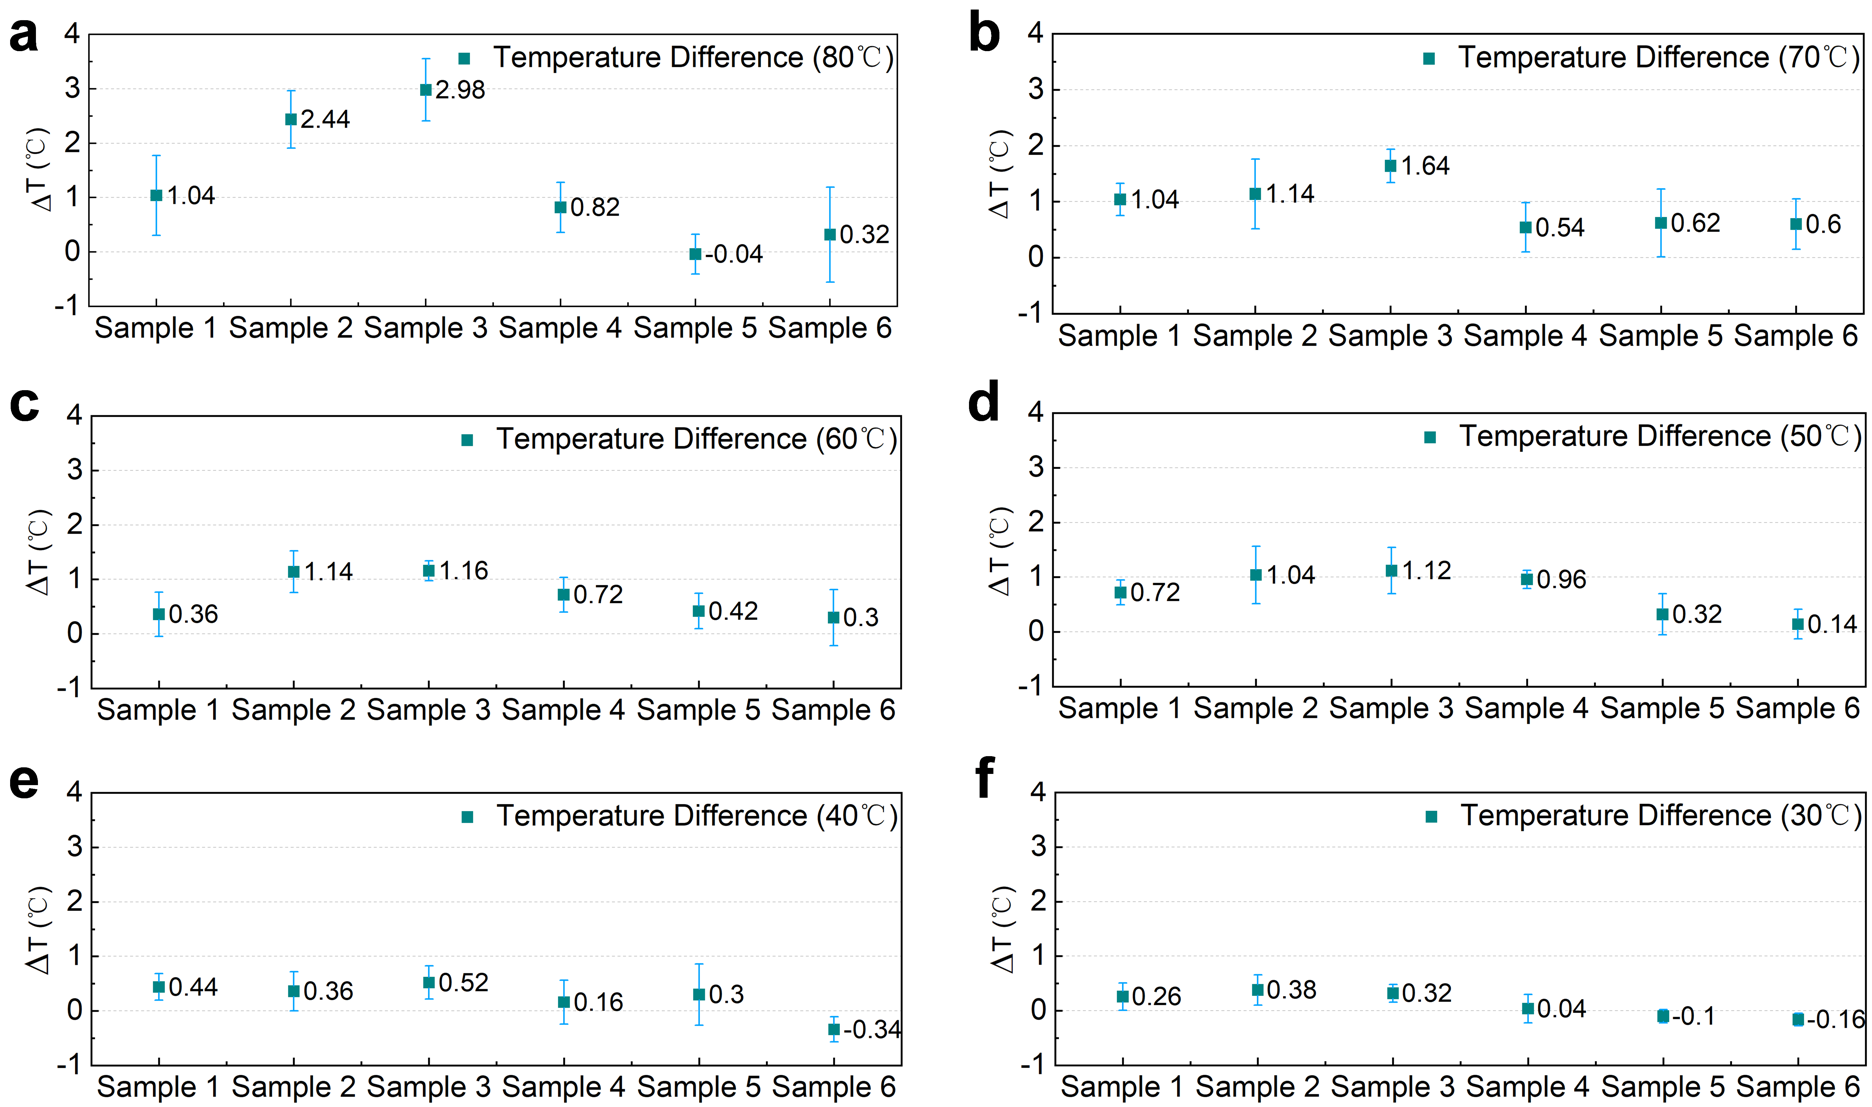
**

**Supplementary Fig. 13. The temperature difference between the two conditions in SF 12.**

**
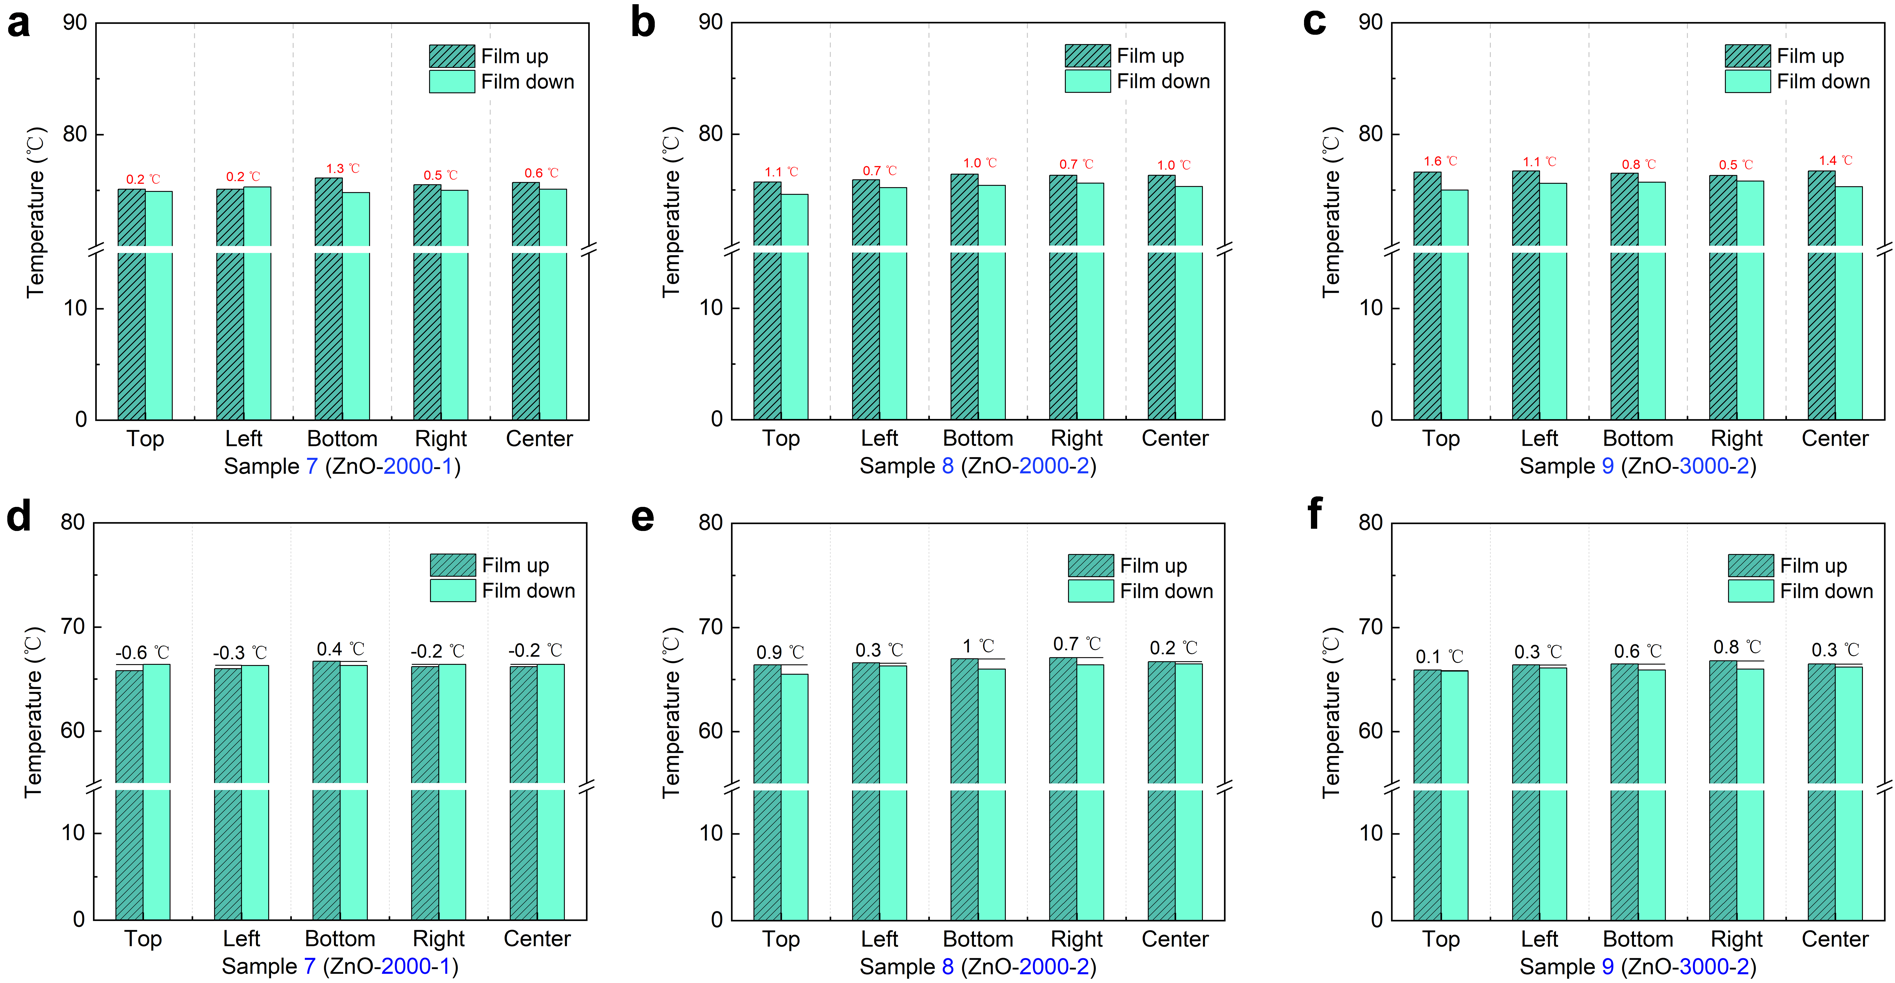
**

**Supplementary Fig. 14. Heat transfer capability of ZnO device.** Sample 7 is spin coated once at the maximum speed of 2000 r/min to prepare a ZnO layer. Sample 8 is spin coated twice at the maximum speed of 2000 r/min to prepare a ZnO layer. Sample 9 is spin coated twice at the maximum speed of 3000 r/min to prepare a ZnO layer. **a-c,** Surface temperature of 3 samples when ZnO layer placed up and down at 80 ℃. **d-f,** Surface temperature of 3 samples when ZnO layer placed up and down at 70 ℃.

**
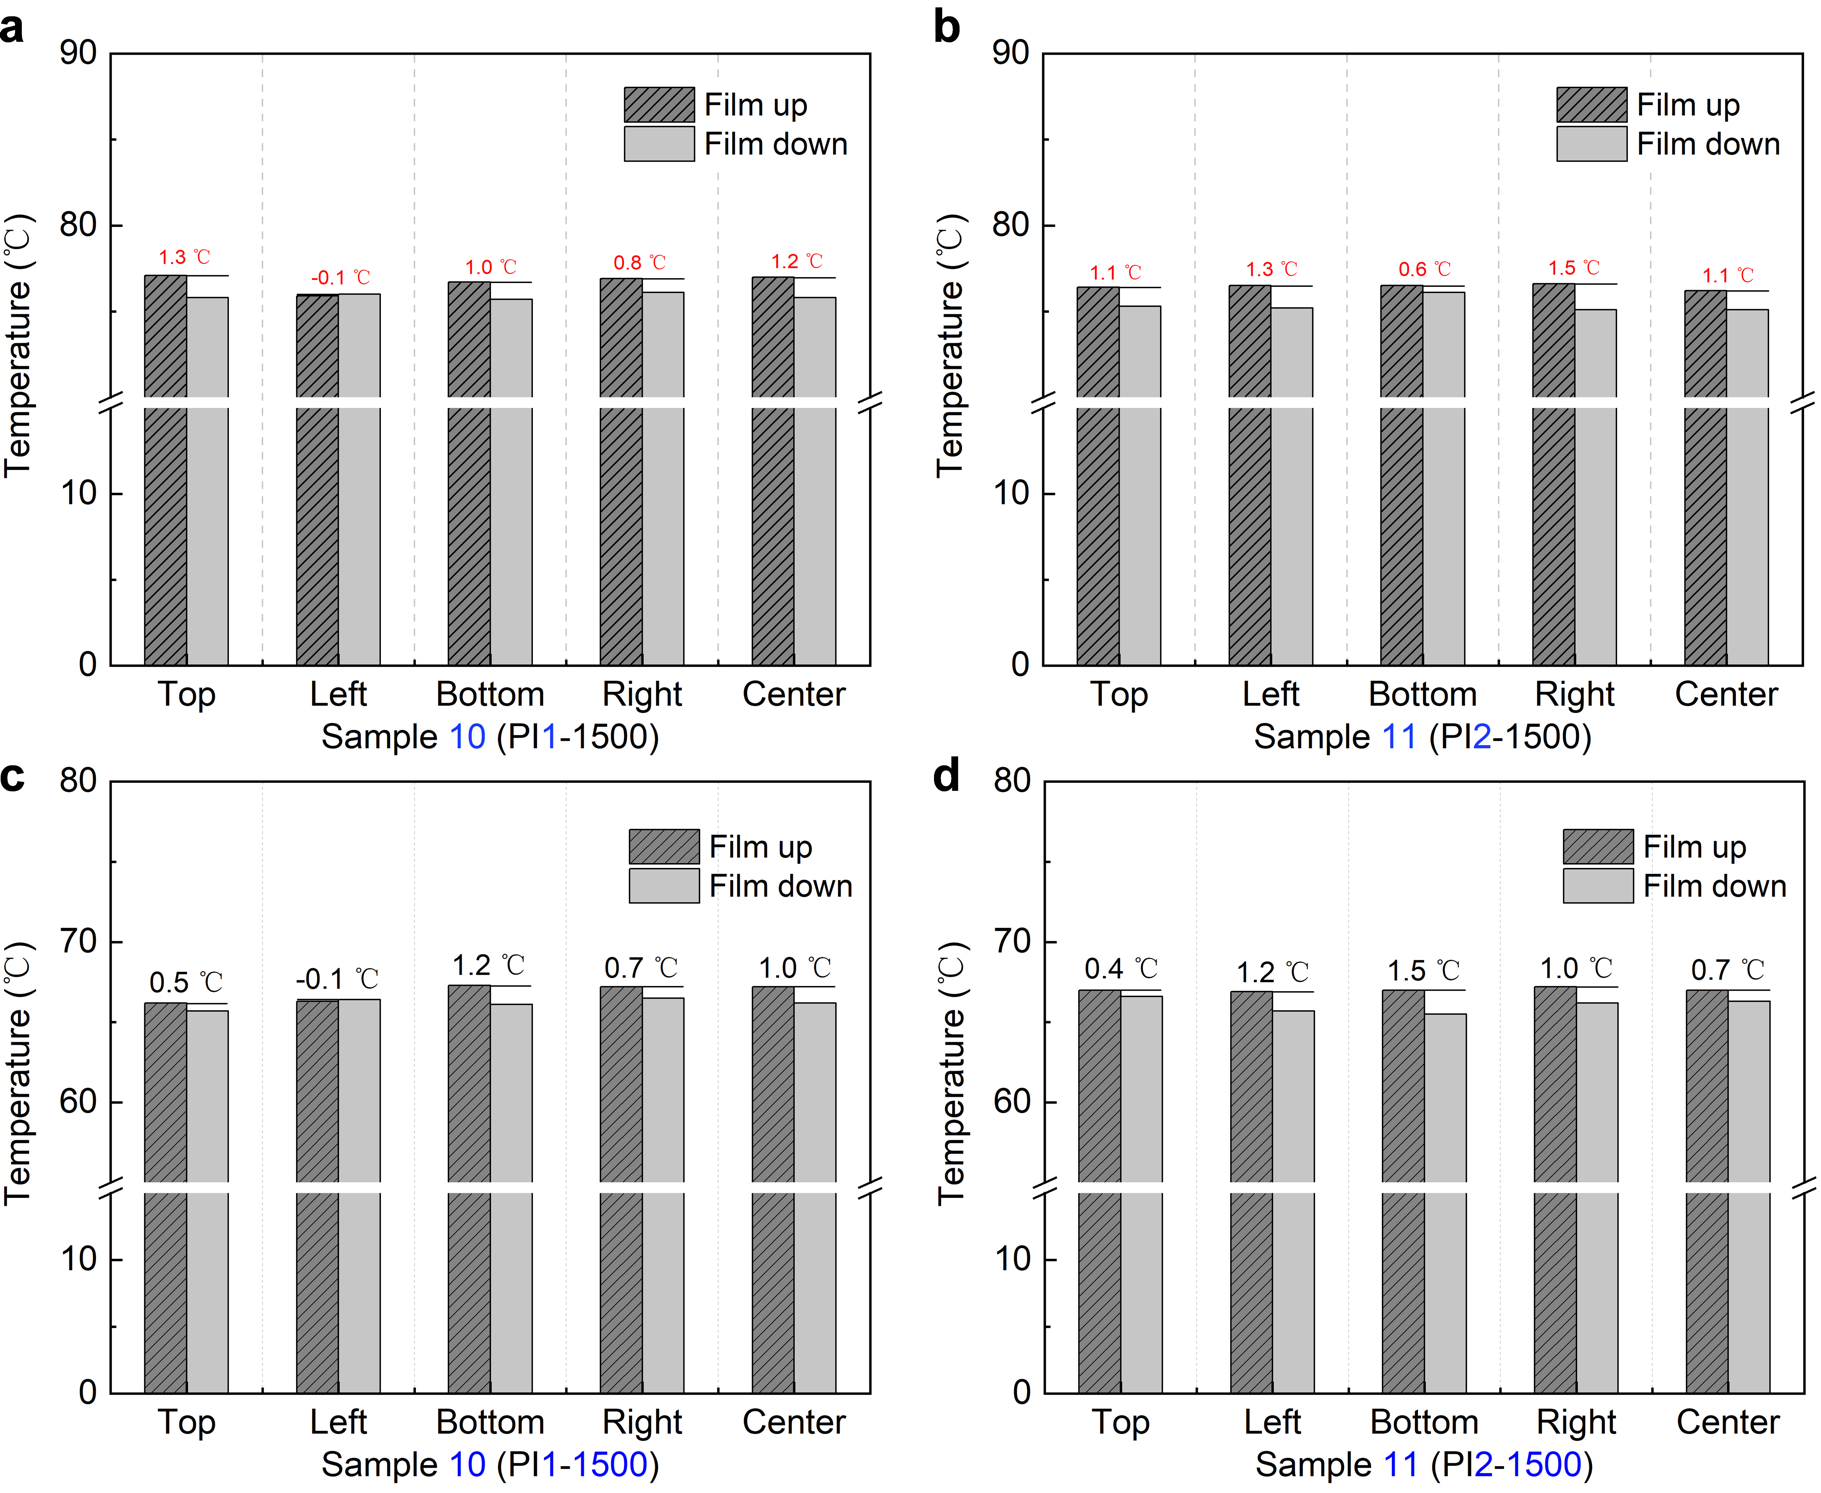
**

**Supplementary Fig. 15. Heat transfer capability of PI device.** PI1 represents adding ODA firstly when preparing PI precursor solution, while PI2 represents the adding PMDA firstly. Sample 10 is spin coated once at the maximum speed of 1500 r/min with PI1 to prepare PI layer. Sample 11 is fabricated under same condition with PI2. **a, b,** Surface temperature of 2 samples when setting temperature is at 80 ℃. **d-f,** Surface temperature of 2 samples when setting temperature is at 70 ℃.

**
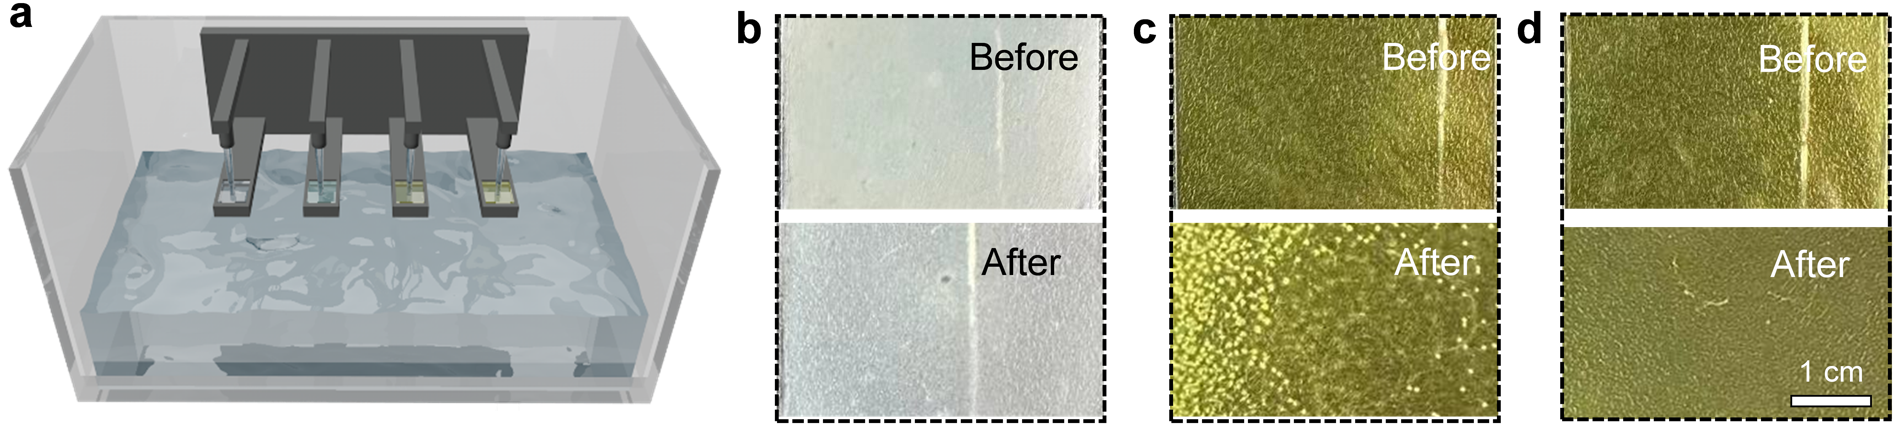
**

**Supplementary Fig. 16. Water flushing test. a,** Schematic diagram of flushing device. **b,** Surface morphology characterization of ZnO device before and after flushing. **c,** Surface morphology characterization of PI device before and after flushing. **d,** Surface morphology characterization of PRC device before and after flushing.

**
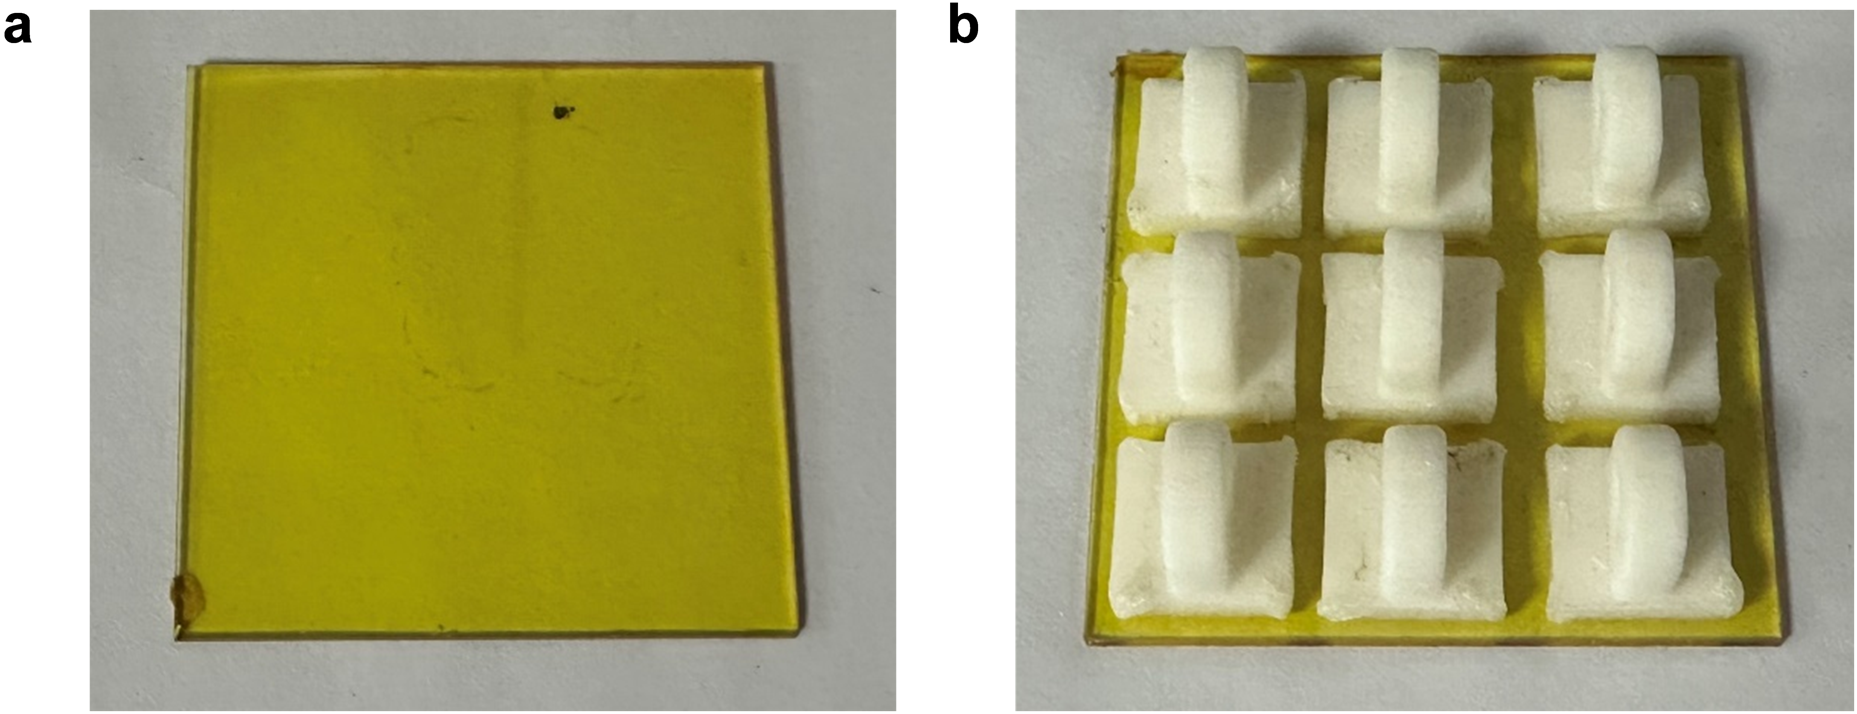
**

**Supplementary Fig. 17. a,** PRC device after flushing. **b,** Pre-treatment for adhesion testing, divide the adhesive hooks into three areas and stick them to the testing surface.

**
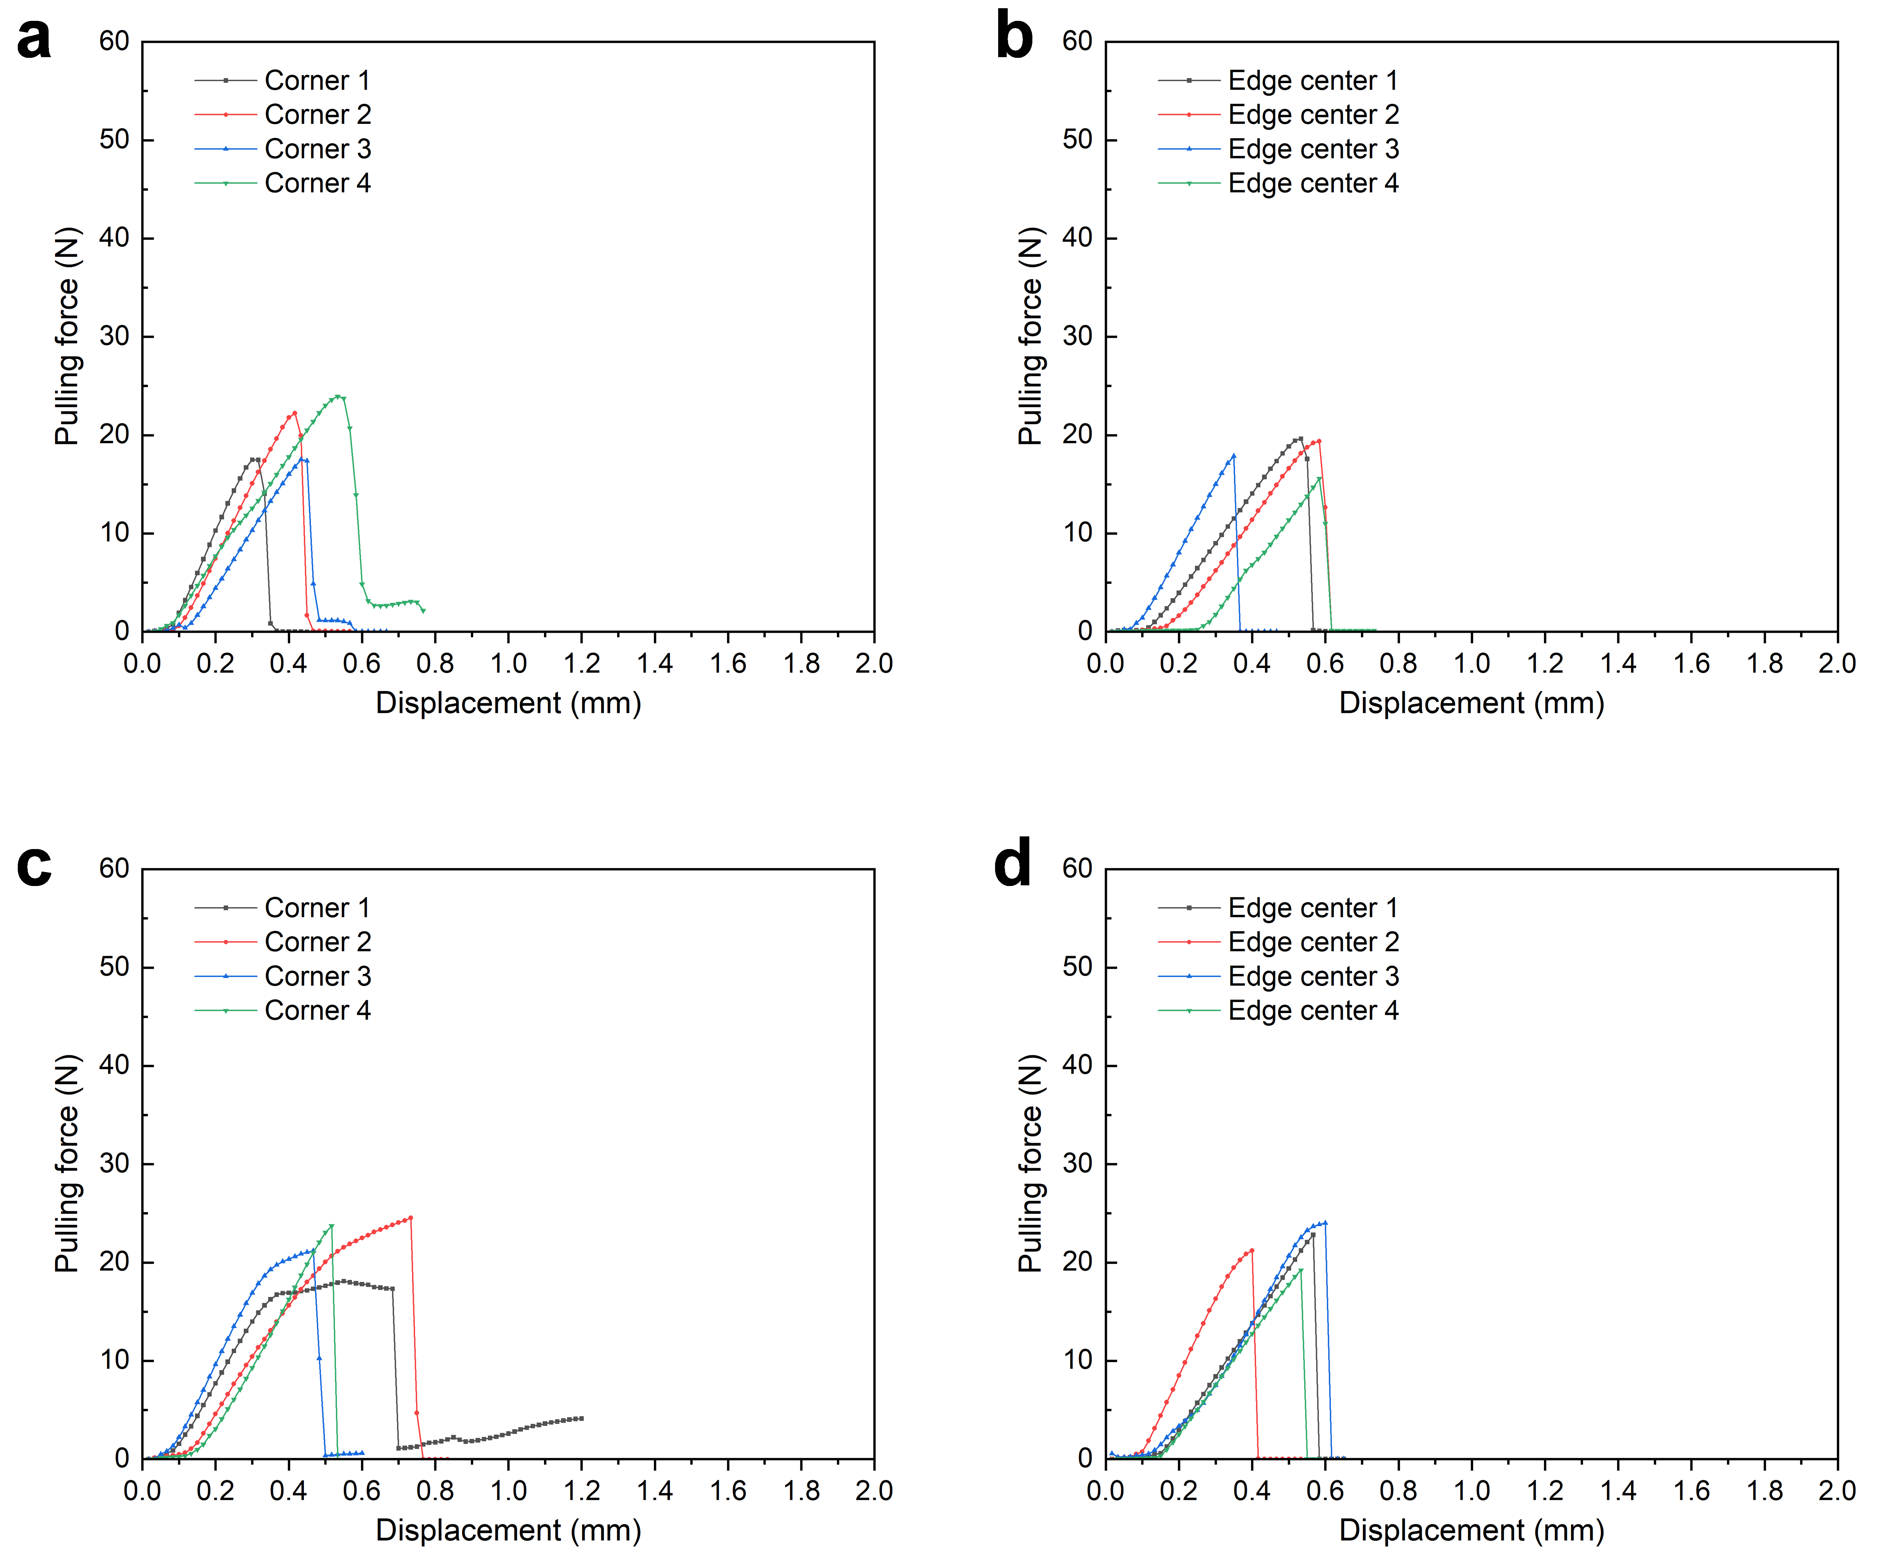
**

**Supplementary Fig. 18. Adhesion test results of PI film before and after flushing process.** **a**, Results of PI device in the corner areas before flushing. **b**, Results of PI film in the edge center areas before flushing. **c**, Results of PI film in the corner areas after flushing. **d**, Results of PI film in the edge center areas after flushing.

**
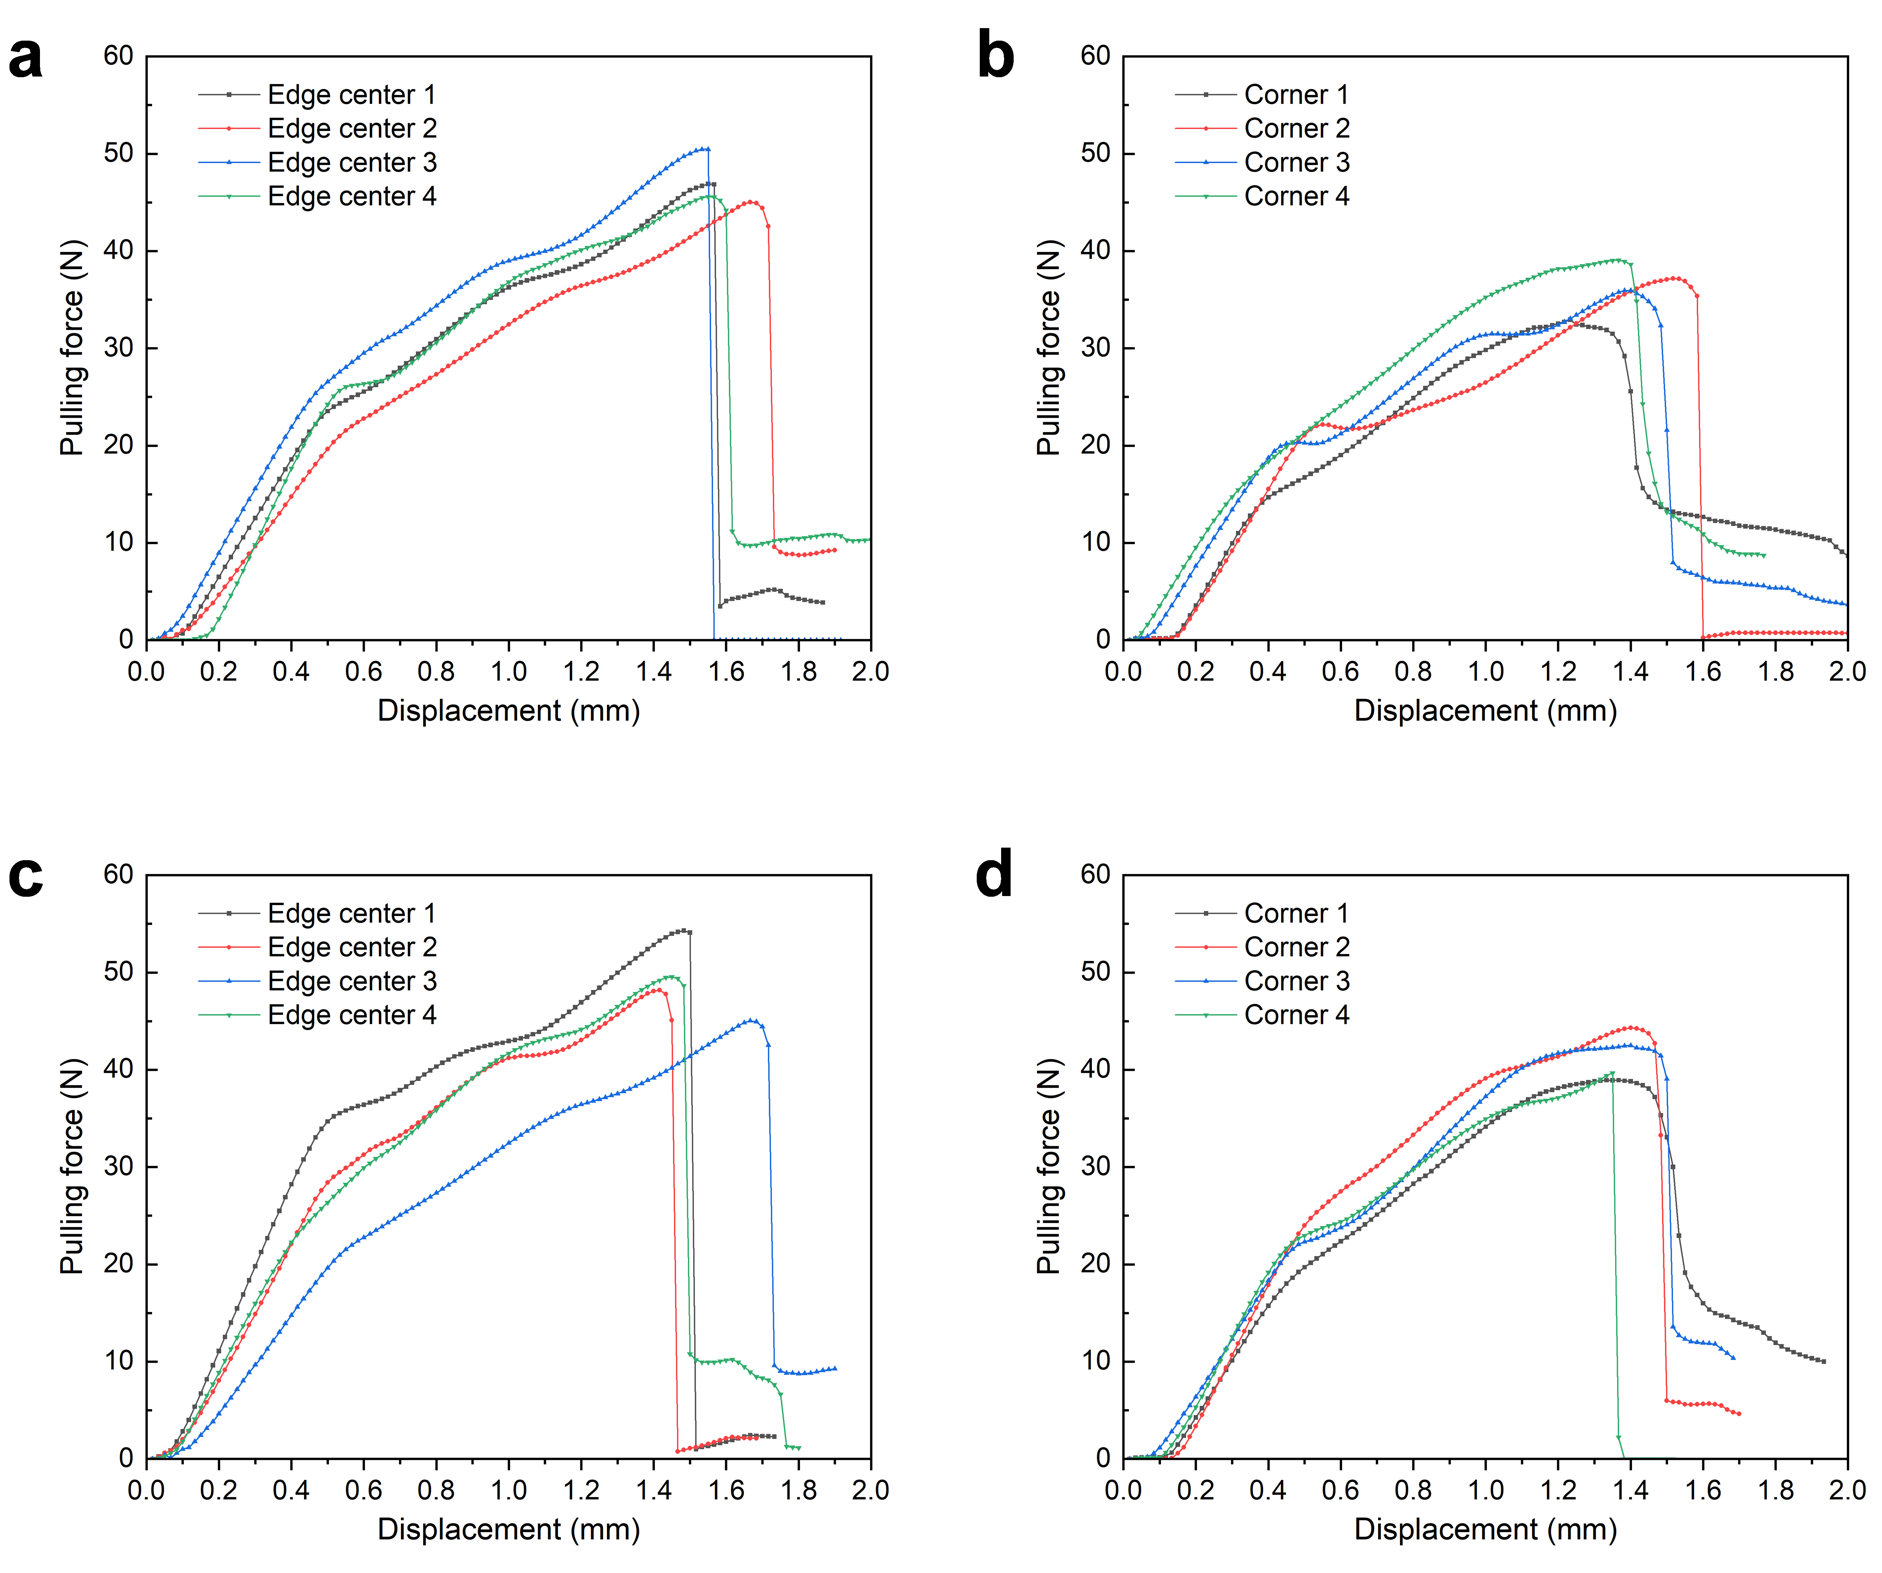
**

**Supplementary Fig. 19. Adhesion test results of PRC device before and after flushing process.** **a**, Results of PRC device in the corner areas before flushing. **b**, Results of PRC device in the edge center areas before flushing. **c**, Results of PRC device in the corner areas after flushing. **d**, Results of PRC device in the edge center areas after flushing.


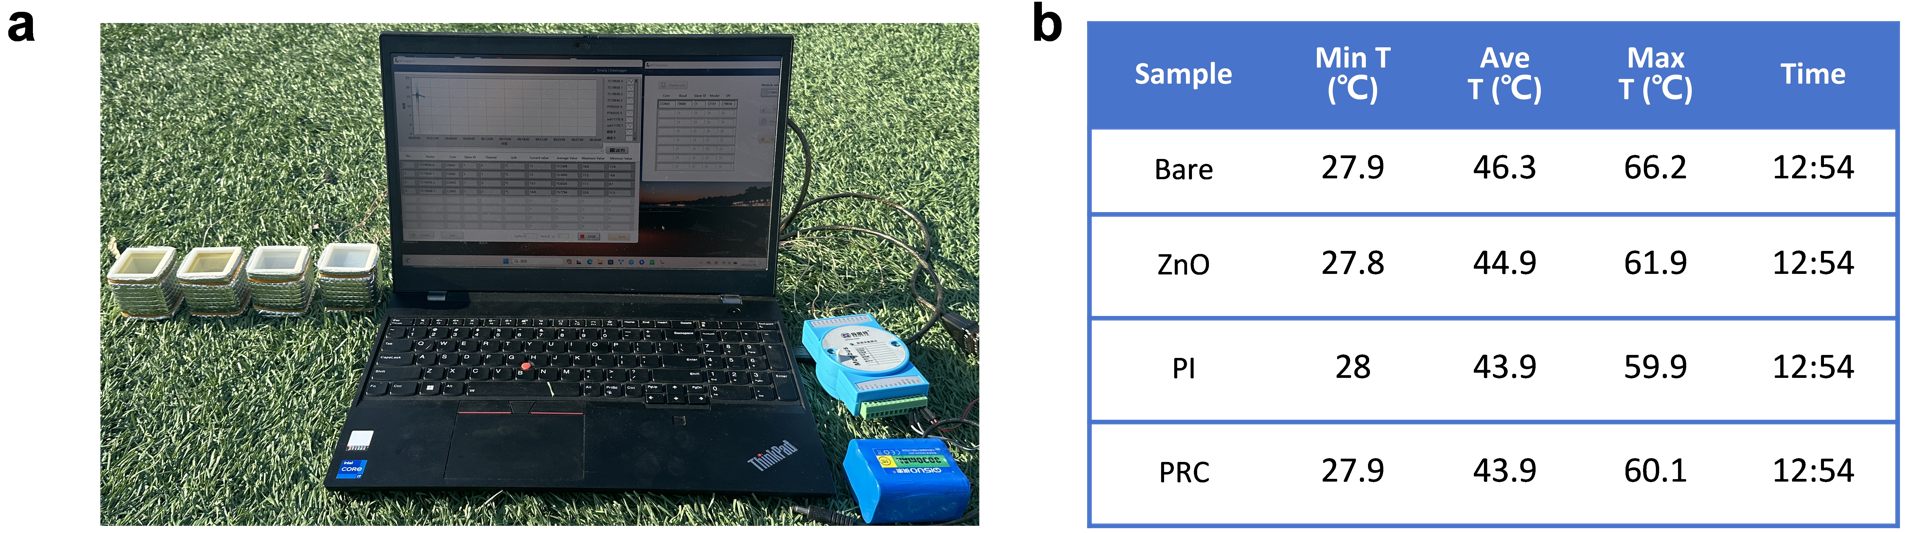


**Supplementary Fig. 20. a**, Outdoor temperature testing device. **b**, Statistics of outdoor temperature test results.


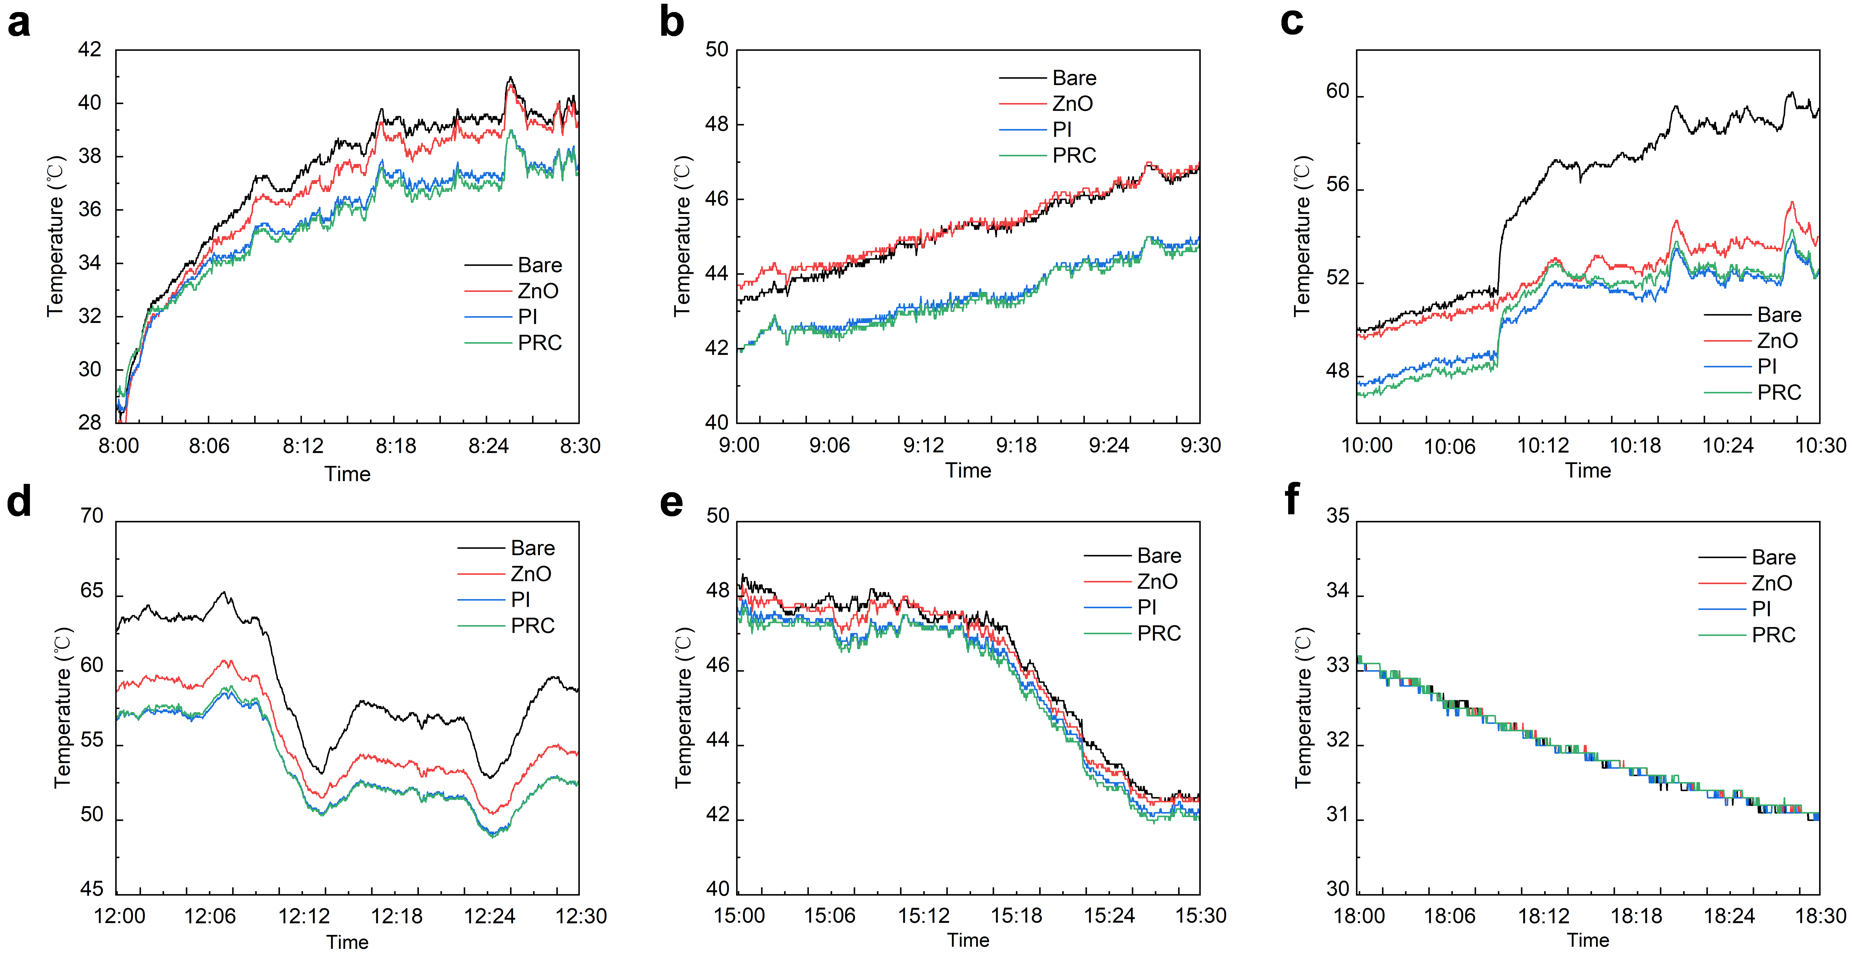


**Supplementary Fig. 21. Detailed information of temperature curves in the whole day.**


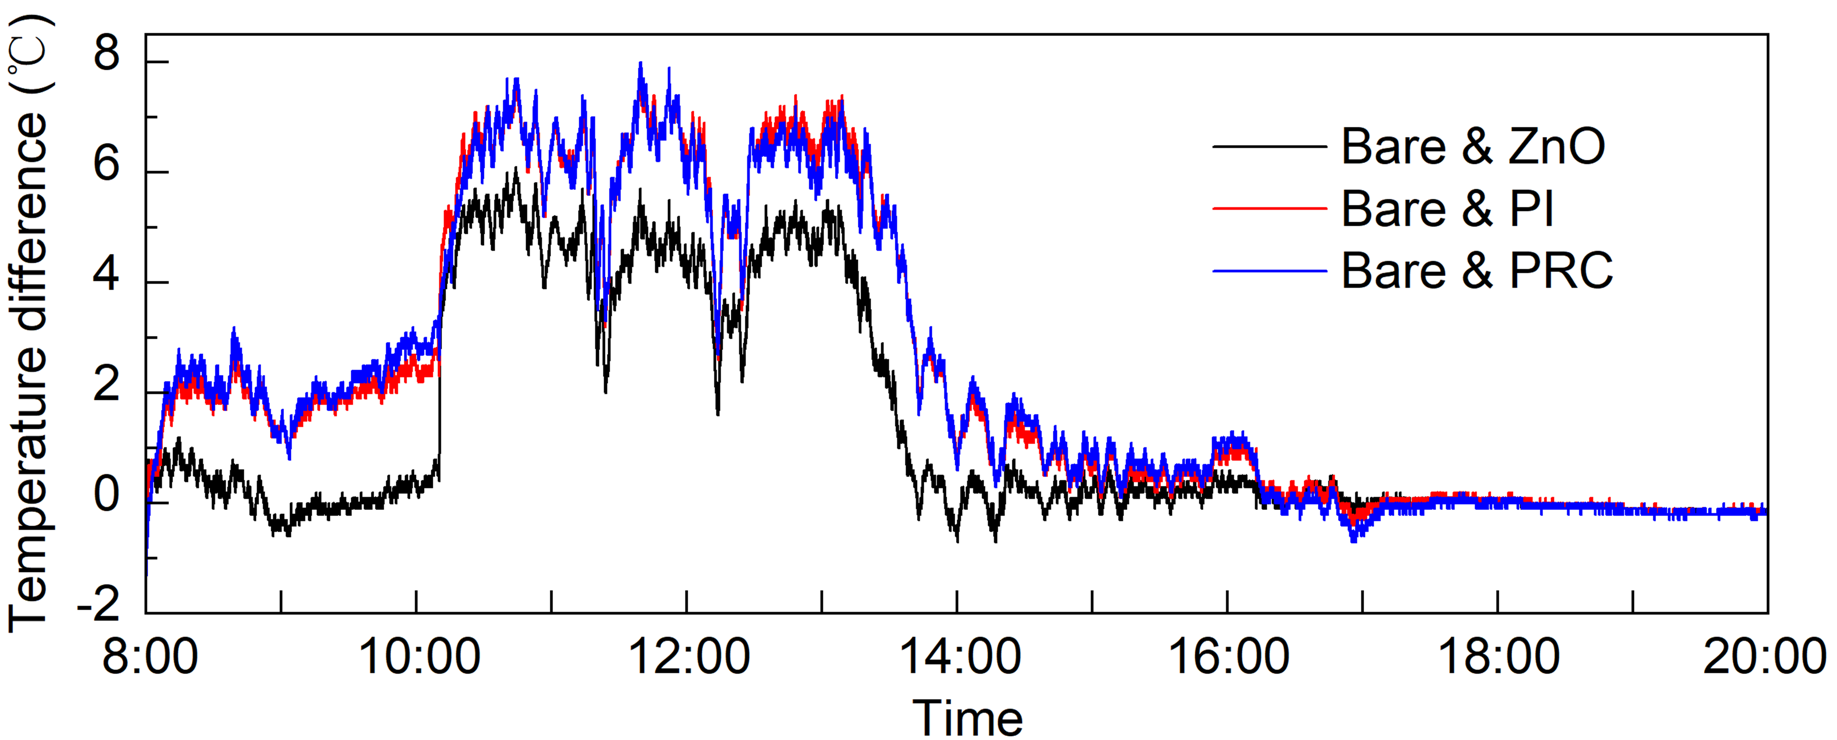


**Supplementary Fig. 22. The temperature difference between the testing device covered with different films.**


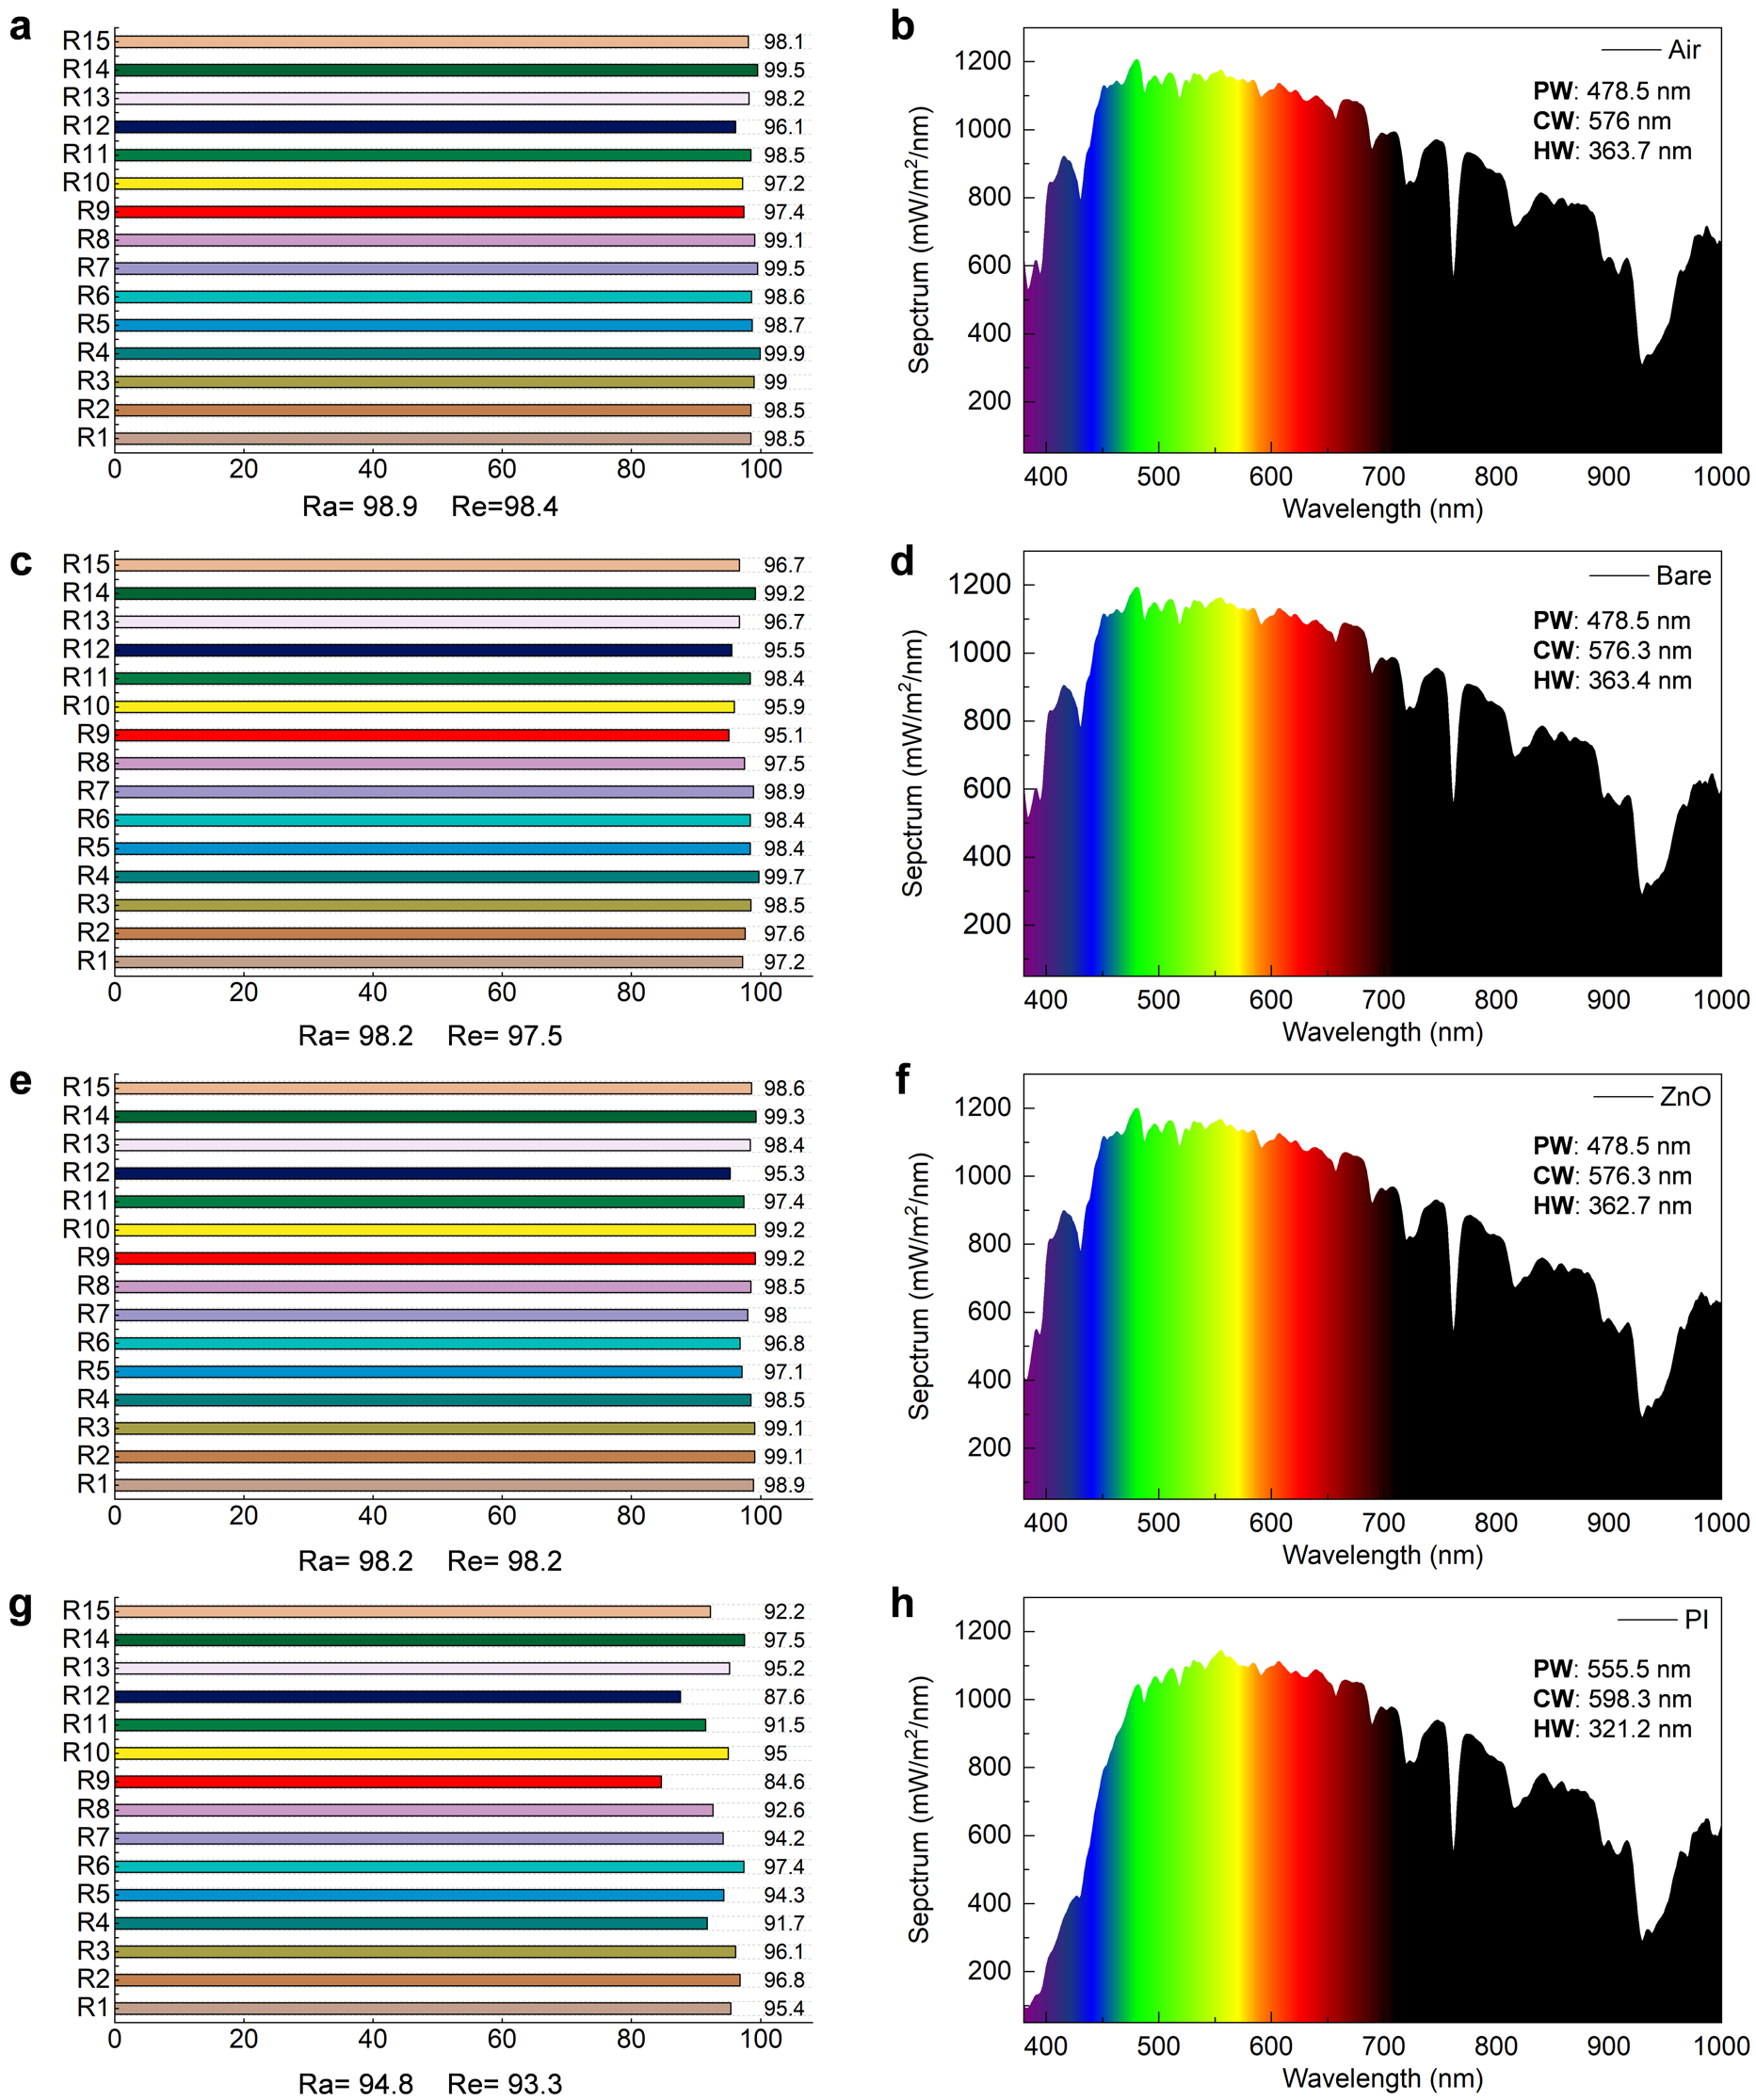


**Supplementary Fig. 23. The composition of sunlight after passing through different samples. a**, **b**, General color rendering index and each light composition of sunlight. **c**, **d**, General color rendering index and each light composition of sunlight after passing through bare glass. **e**, **f**, General color rendering index and each light composition of sunlight after passing through ZnO device. **g**, **h**, General color rendering index and each light composition of sunlight after passing through PI device.


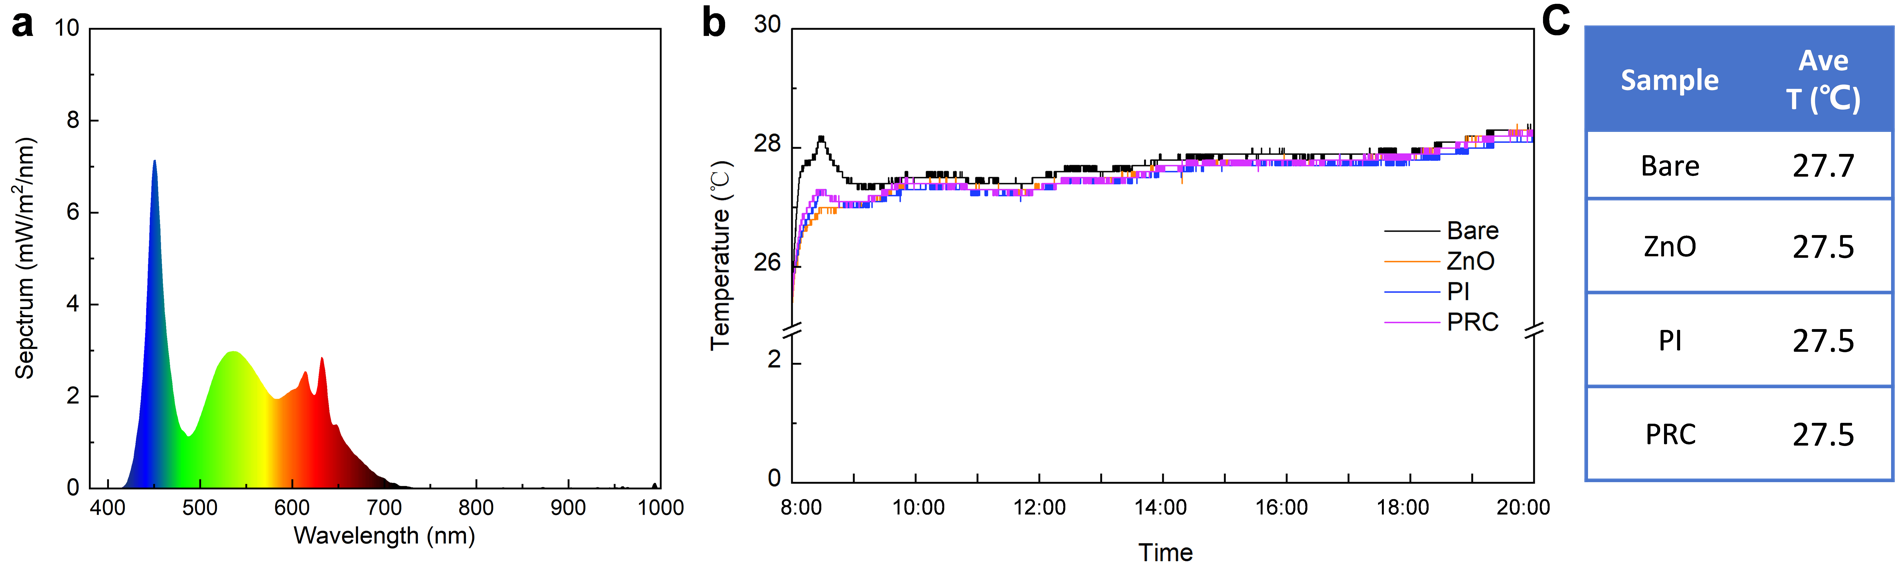


**Supplementary Fig. 24. a**, The composition of indoor light. **b**, Indoor temperature and average temperature statistics of 4 samples.

**Supplementary Table 1. Fabrication parameters of samples mentioned in Fig. 3**

| Sample number | ZnO layer | | PI layer | | |
| --- | --- | --- | --- | --- | --- |
| Spin coating speed (r/min) | Spin coating frequency | PI precursor | Spin coating speed (r/min) | Spin coating frequency |
| Sample 1 | 2000 | 1 | PI1 | 1500 | 1 |
| Sample 2 | 2000 | 2 | PI1 | 1500 | 1 |
| Sample 3 | 3000 | 2 | PI1 | 1500 | 1 |
| Sample 4 | 2000 | 1 | PI2 | 1500 | 1 |
| Sample 5 | 2000 | 2 | PI2 | 1500 | 1 |
| Sample 6 | 3000 | 2 | PI2 | 1500 | 1 |
| Sample 7 | 2000 | 1 |  |  |  |
| Sample 8 | 2000 | 2 |  |  |  |
| Sample 9 | 3000 | 2 |  |  |  |
| Sample 10 |  |  | PI1 | 1500 | 1 |
| Sample 11 |  |  | PI2 | 1500 | 1 |
